# Supplementary material
Source: PubMed Central journal article supplement (PMC3019742)

Genetic Variation - All Soil *E. coli*

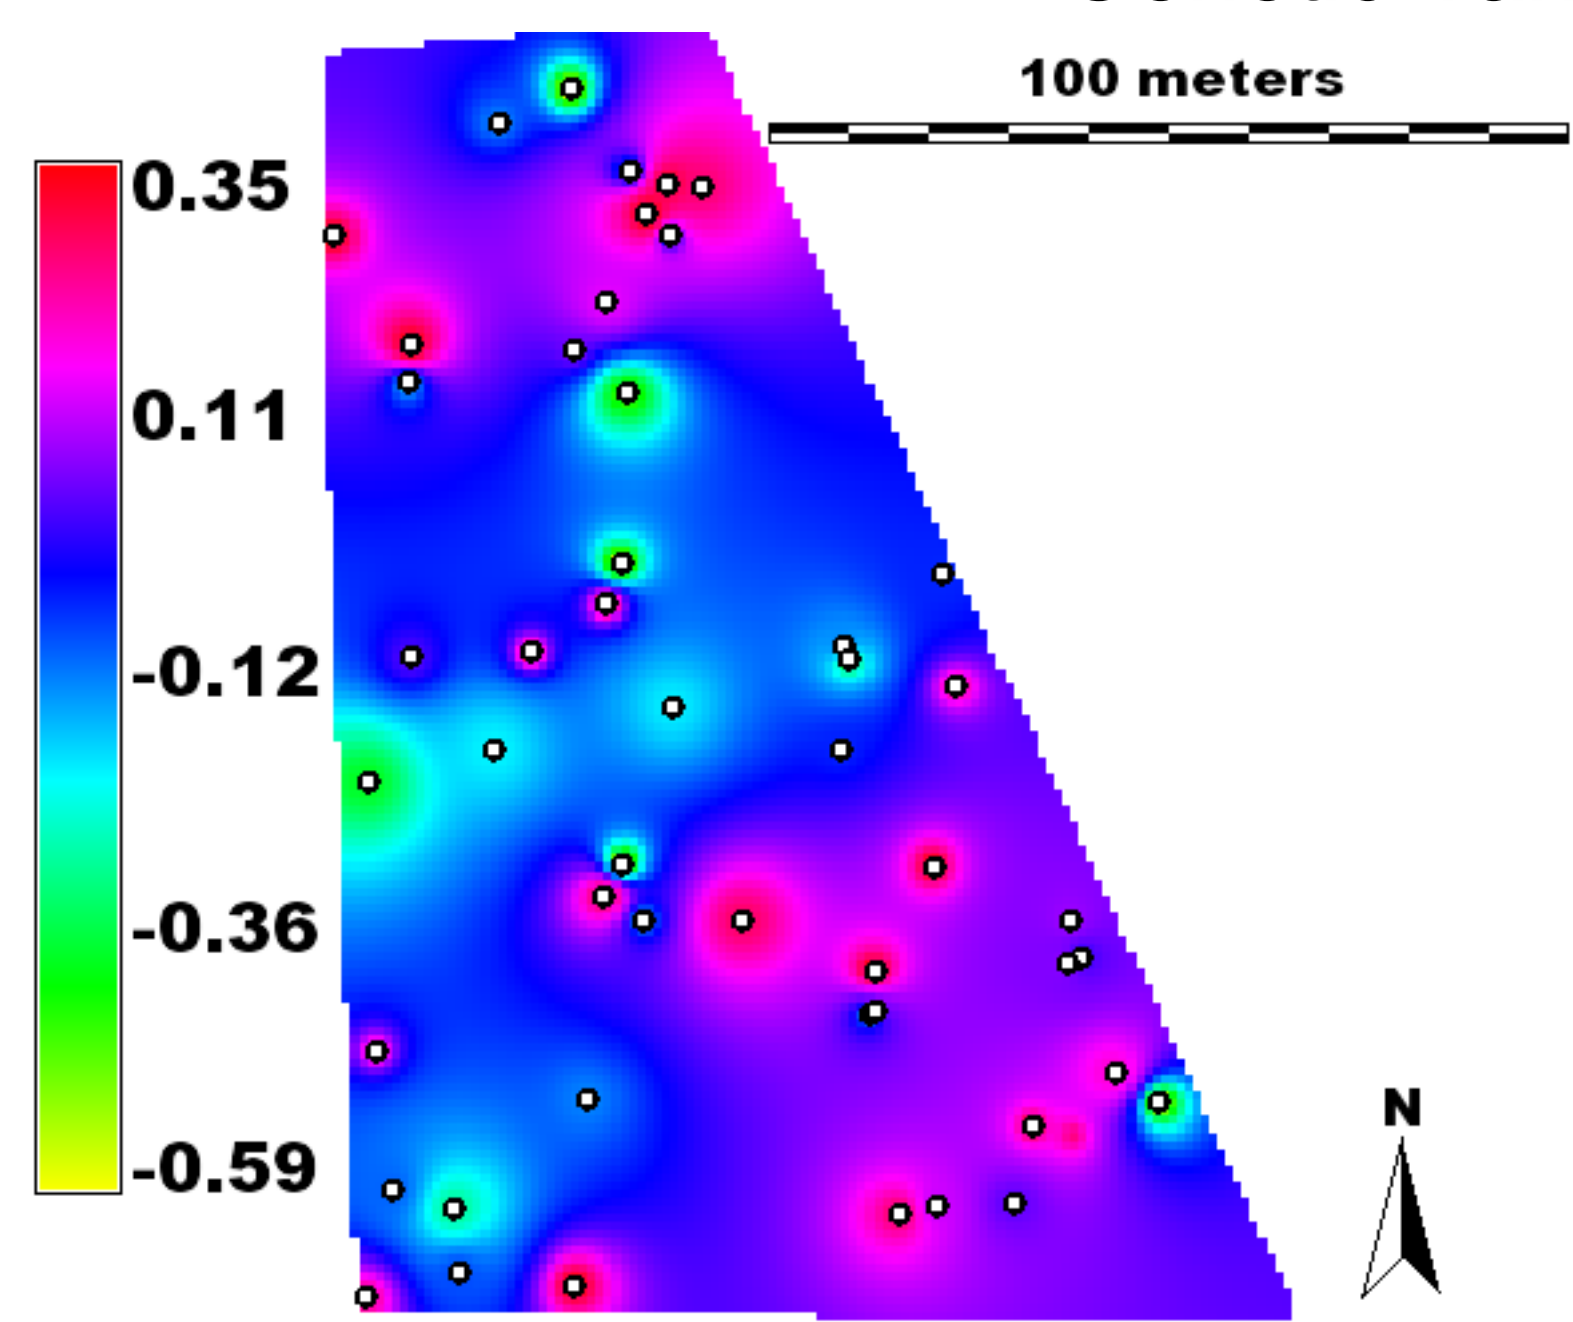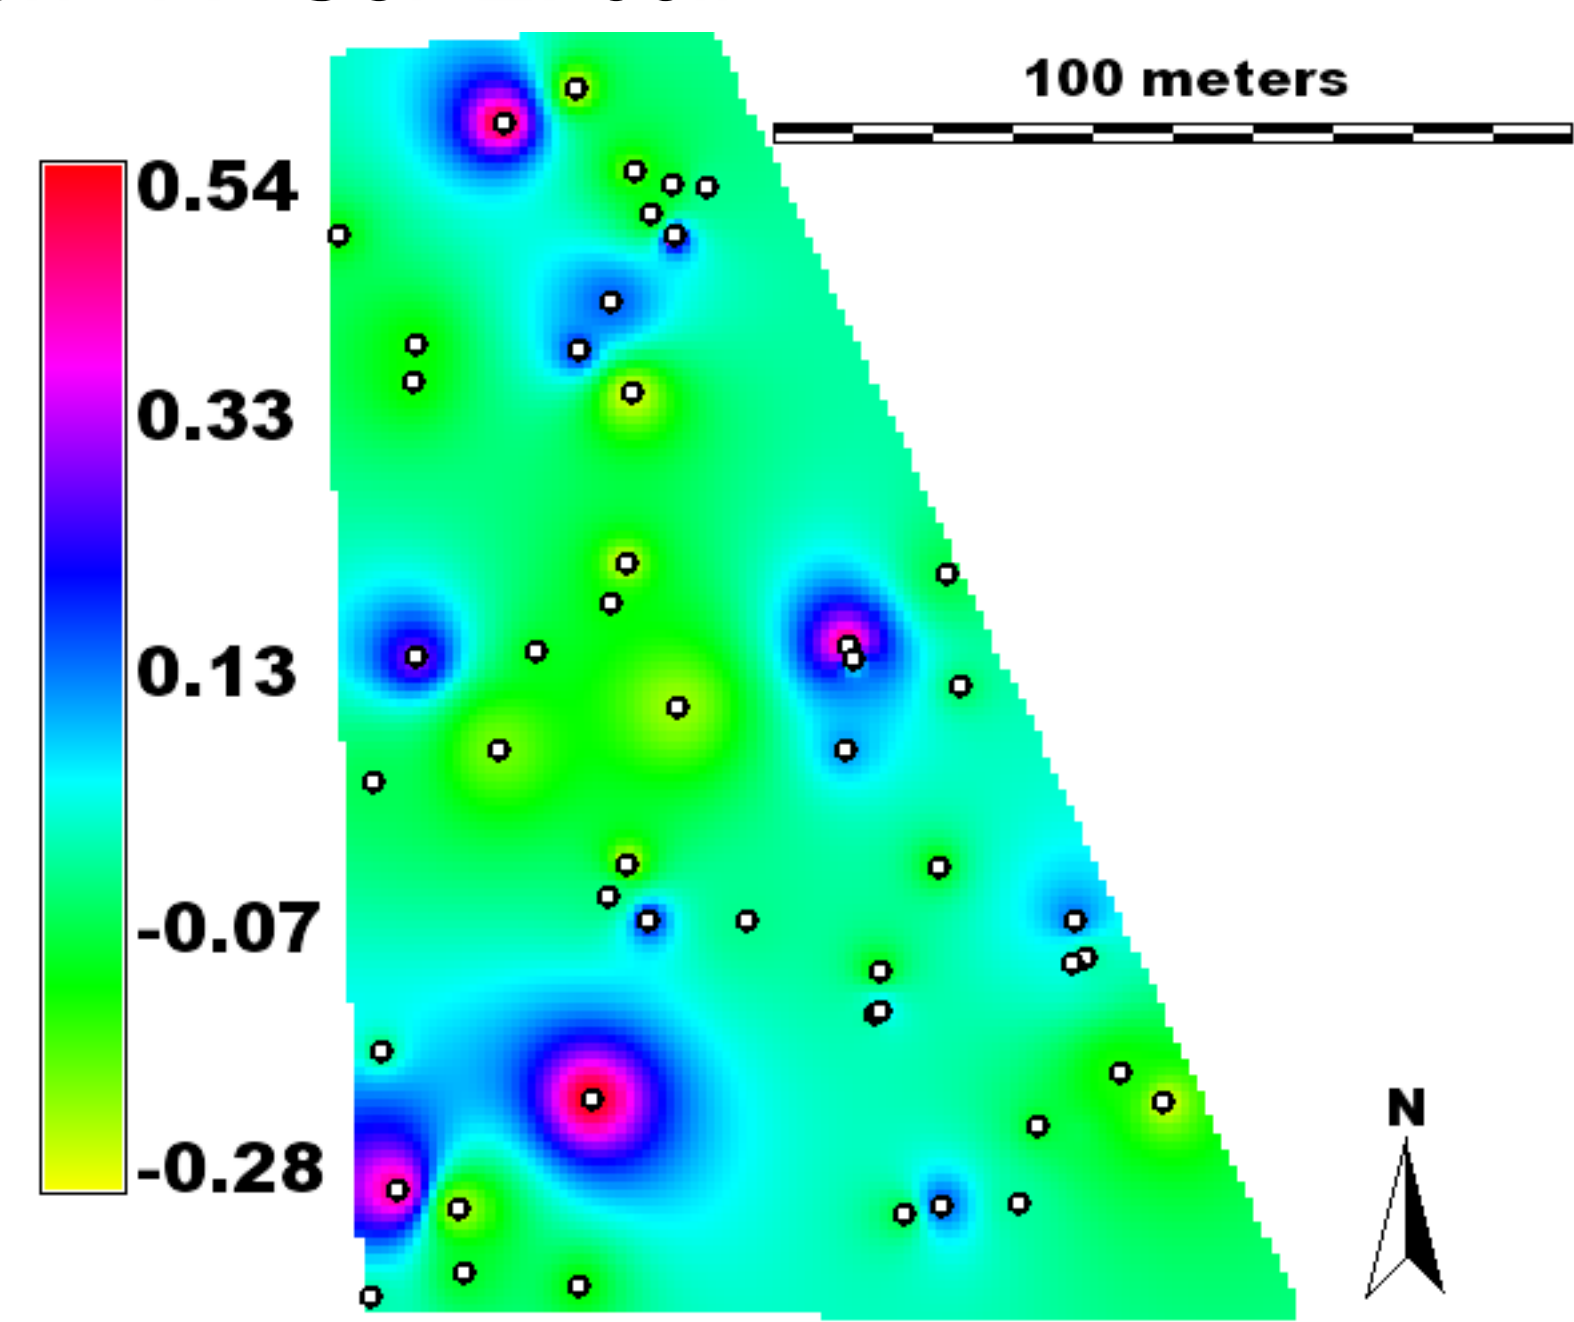

Genetic Variation - Clade B1A

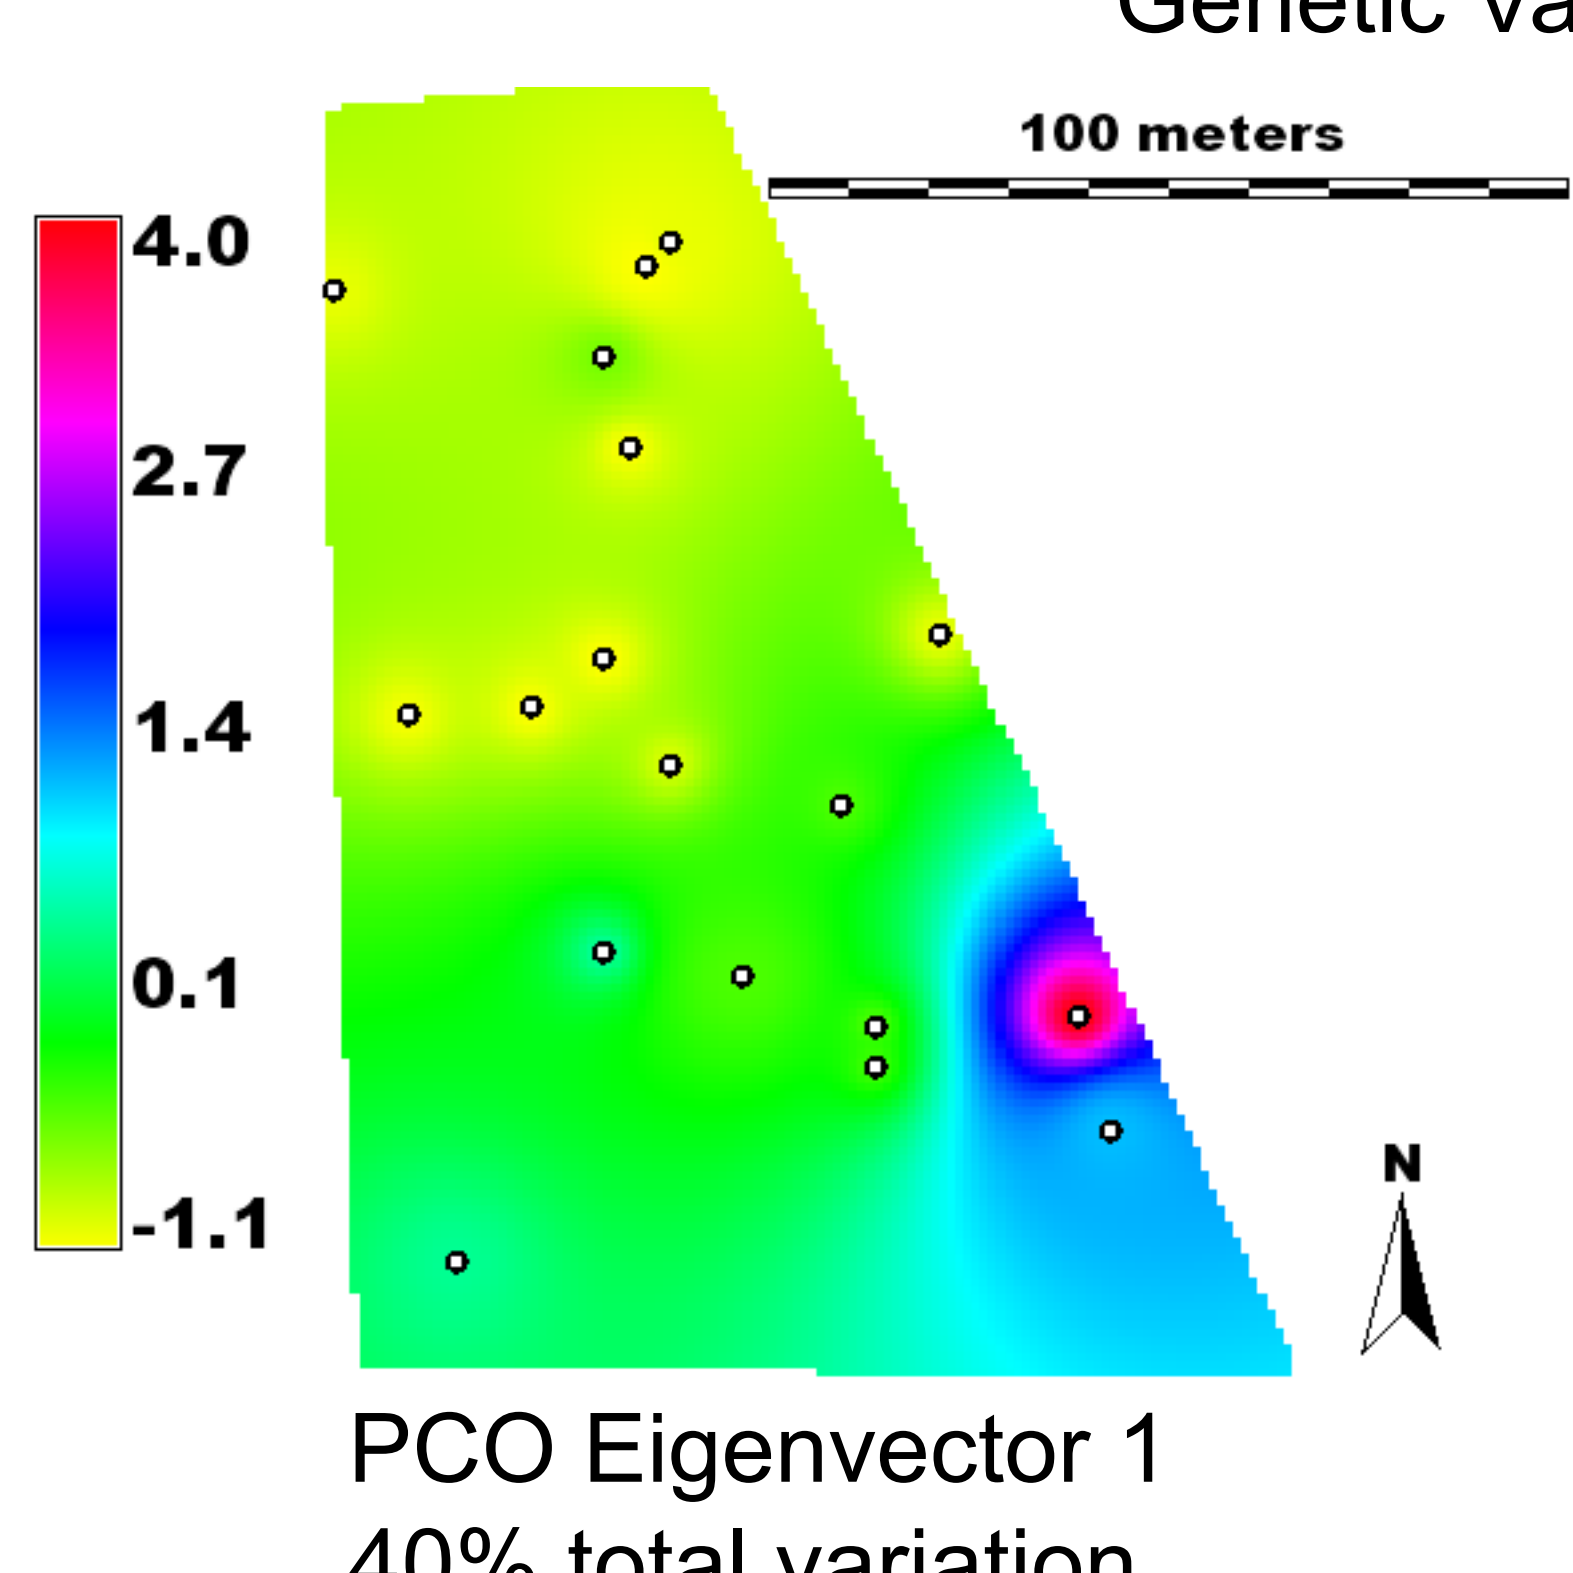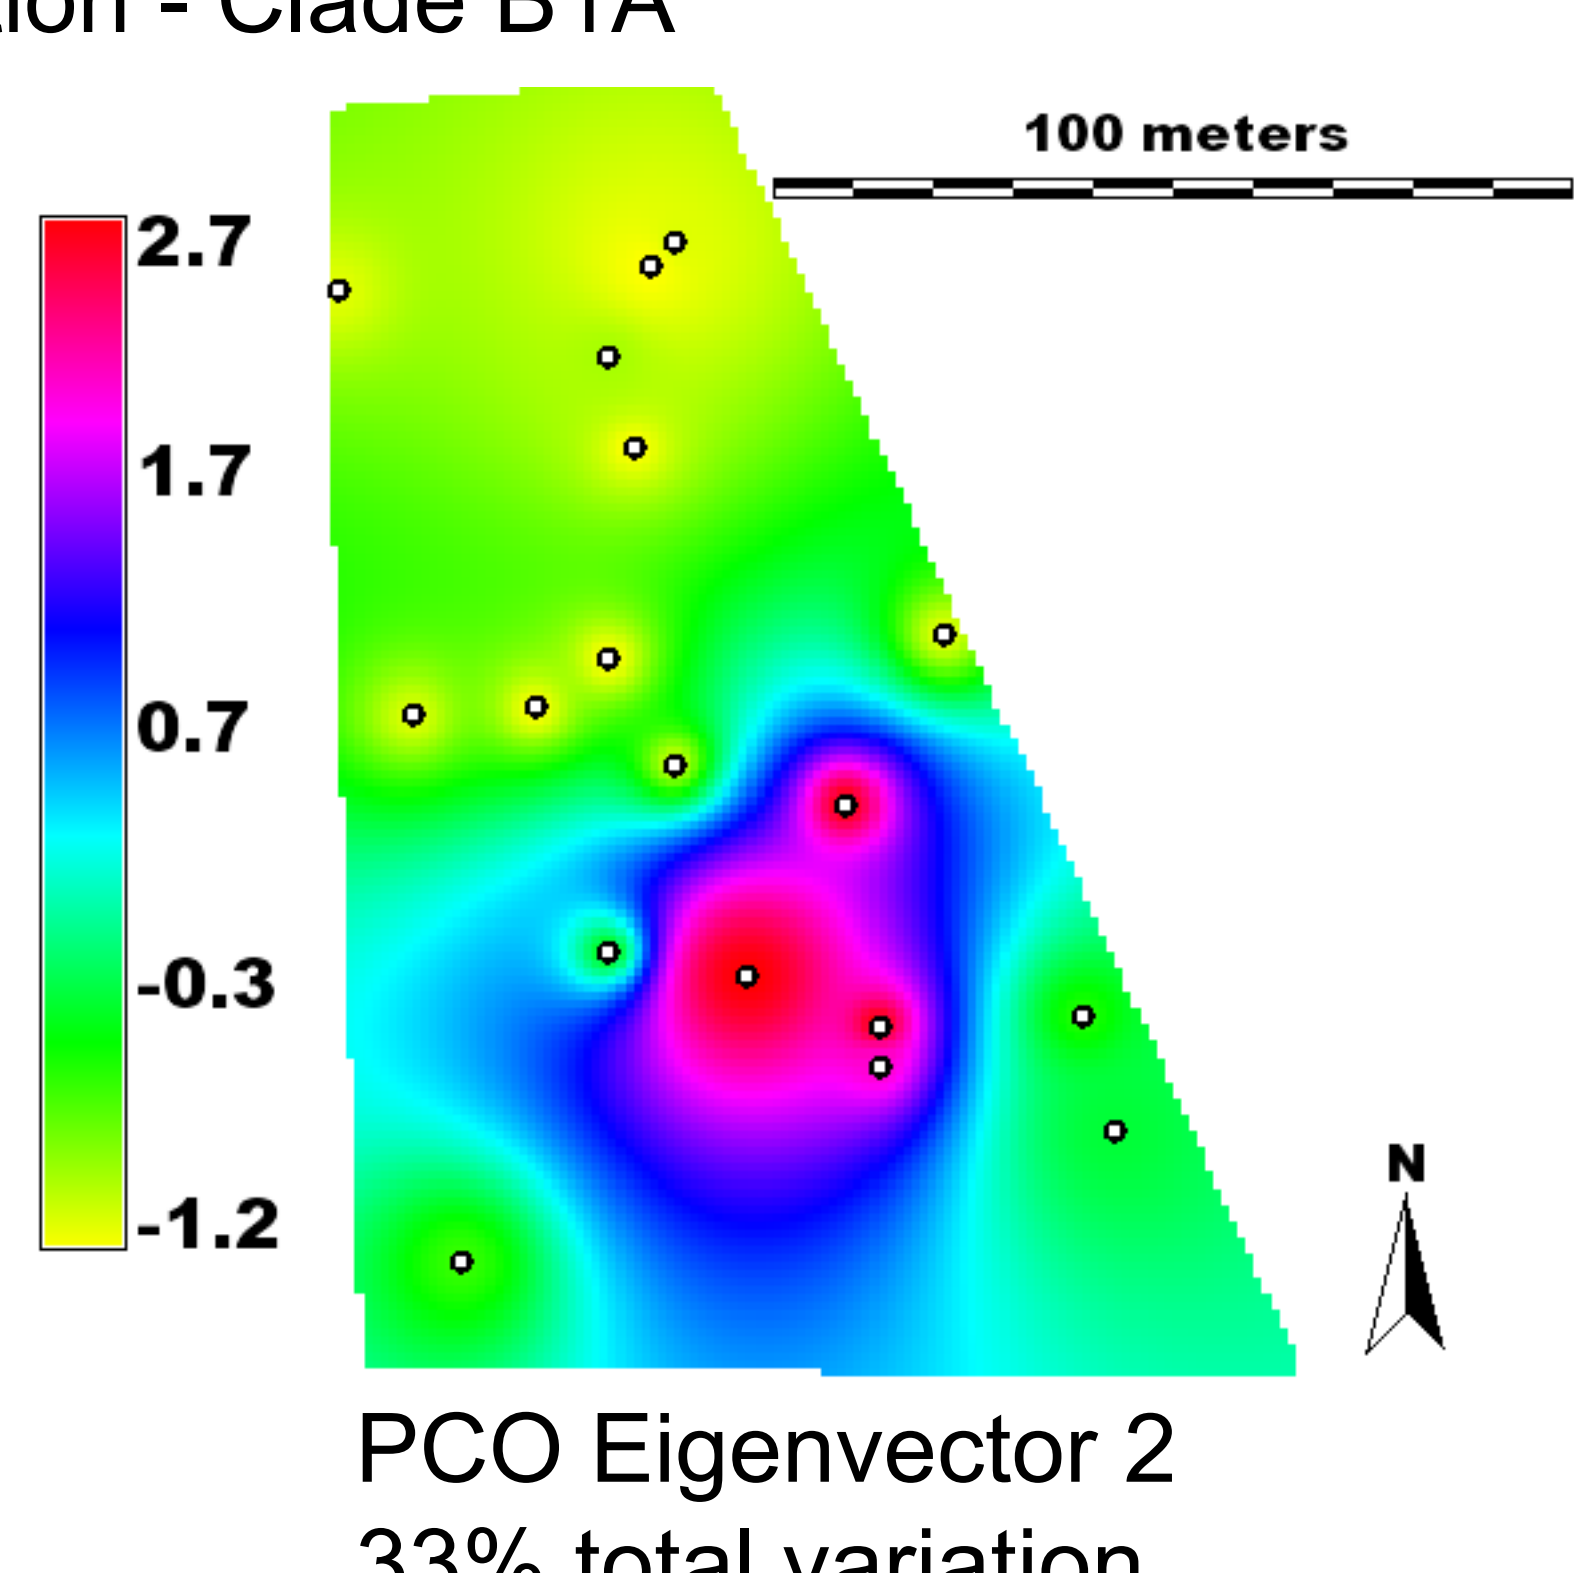

Genetic Variation - Clade B1B

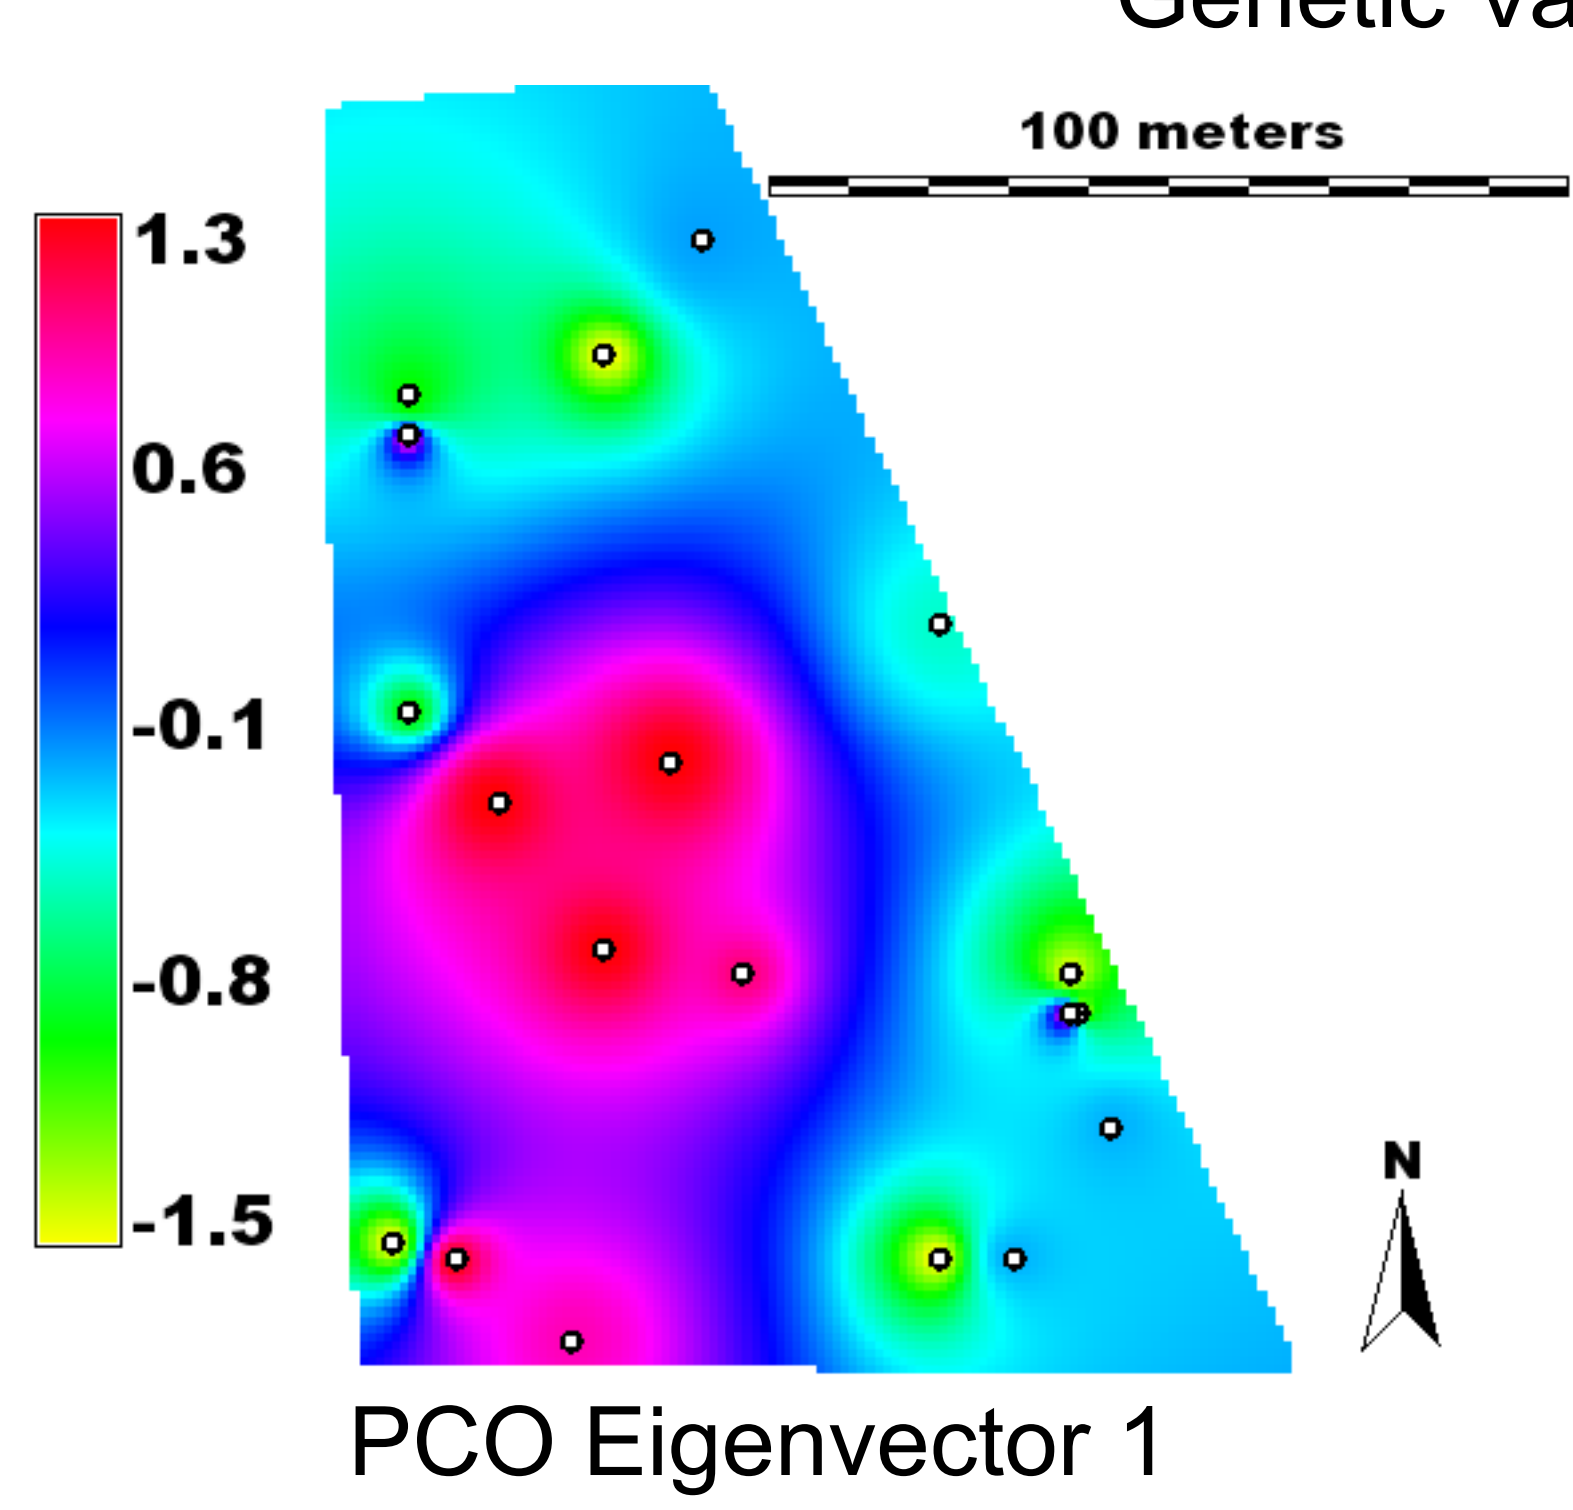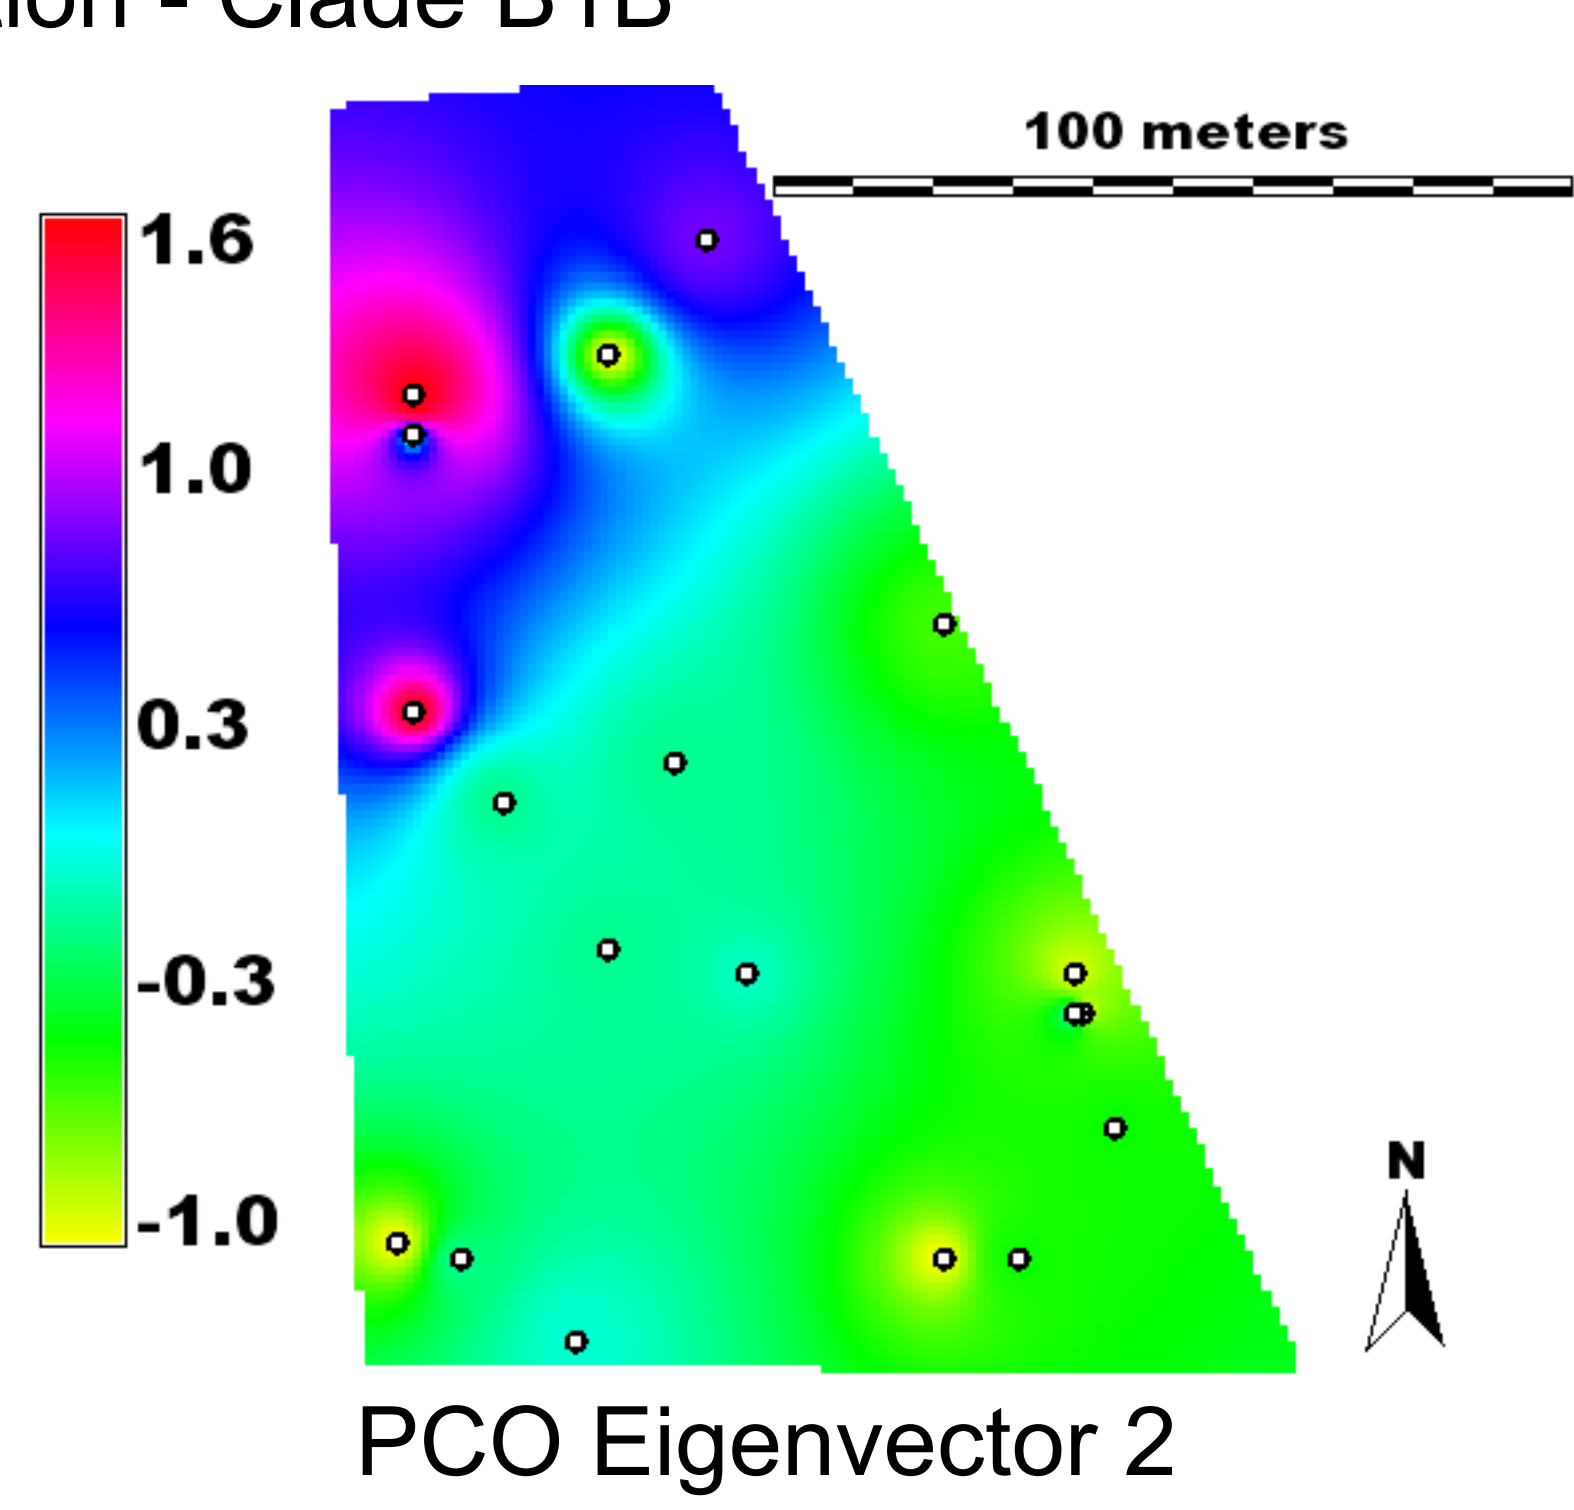

Genetic Variation - ECOR B2

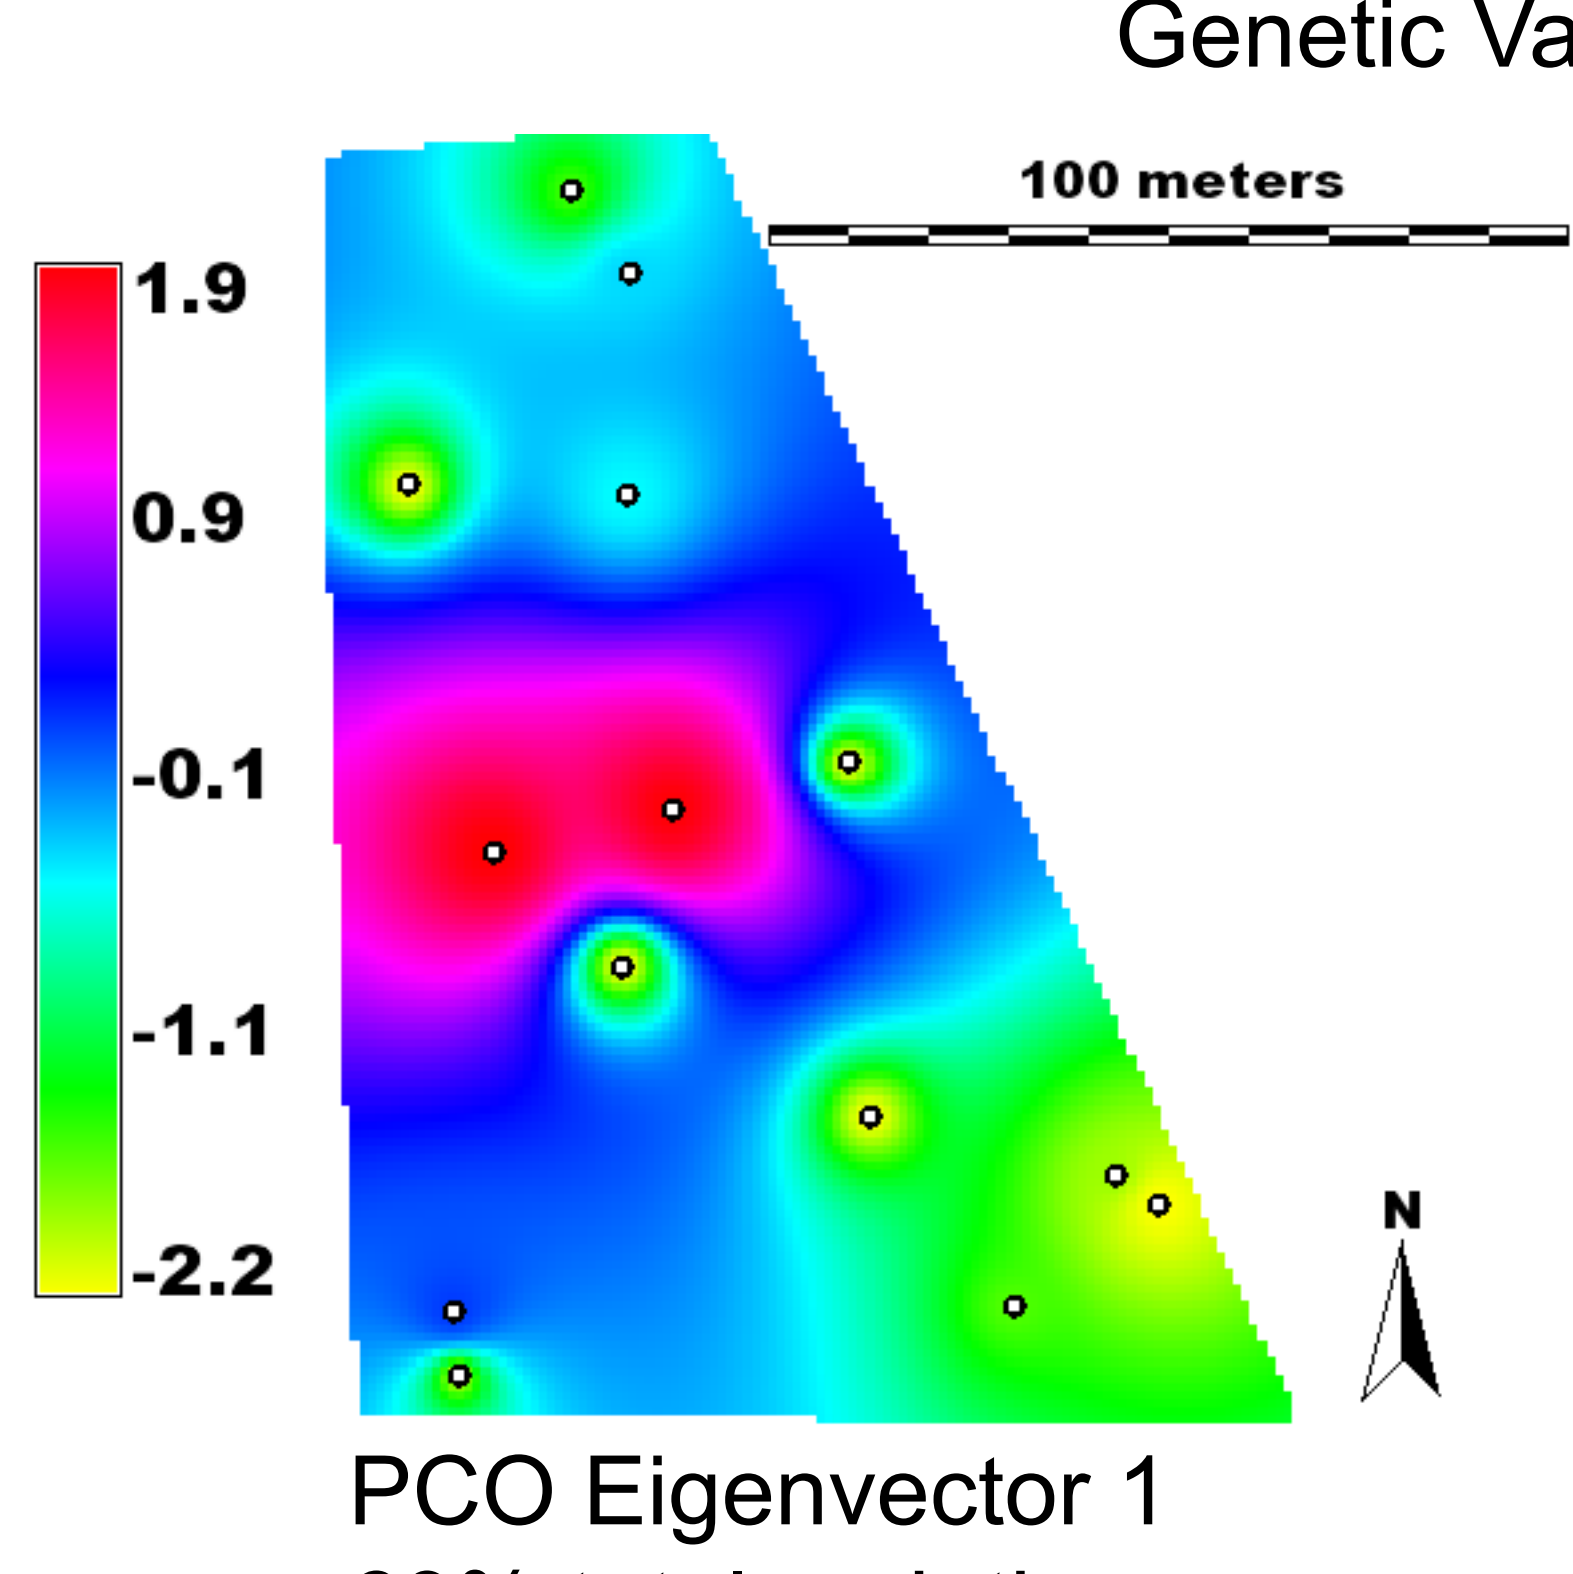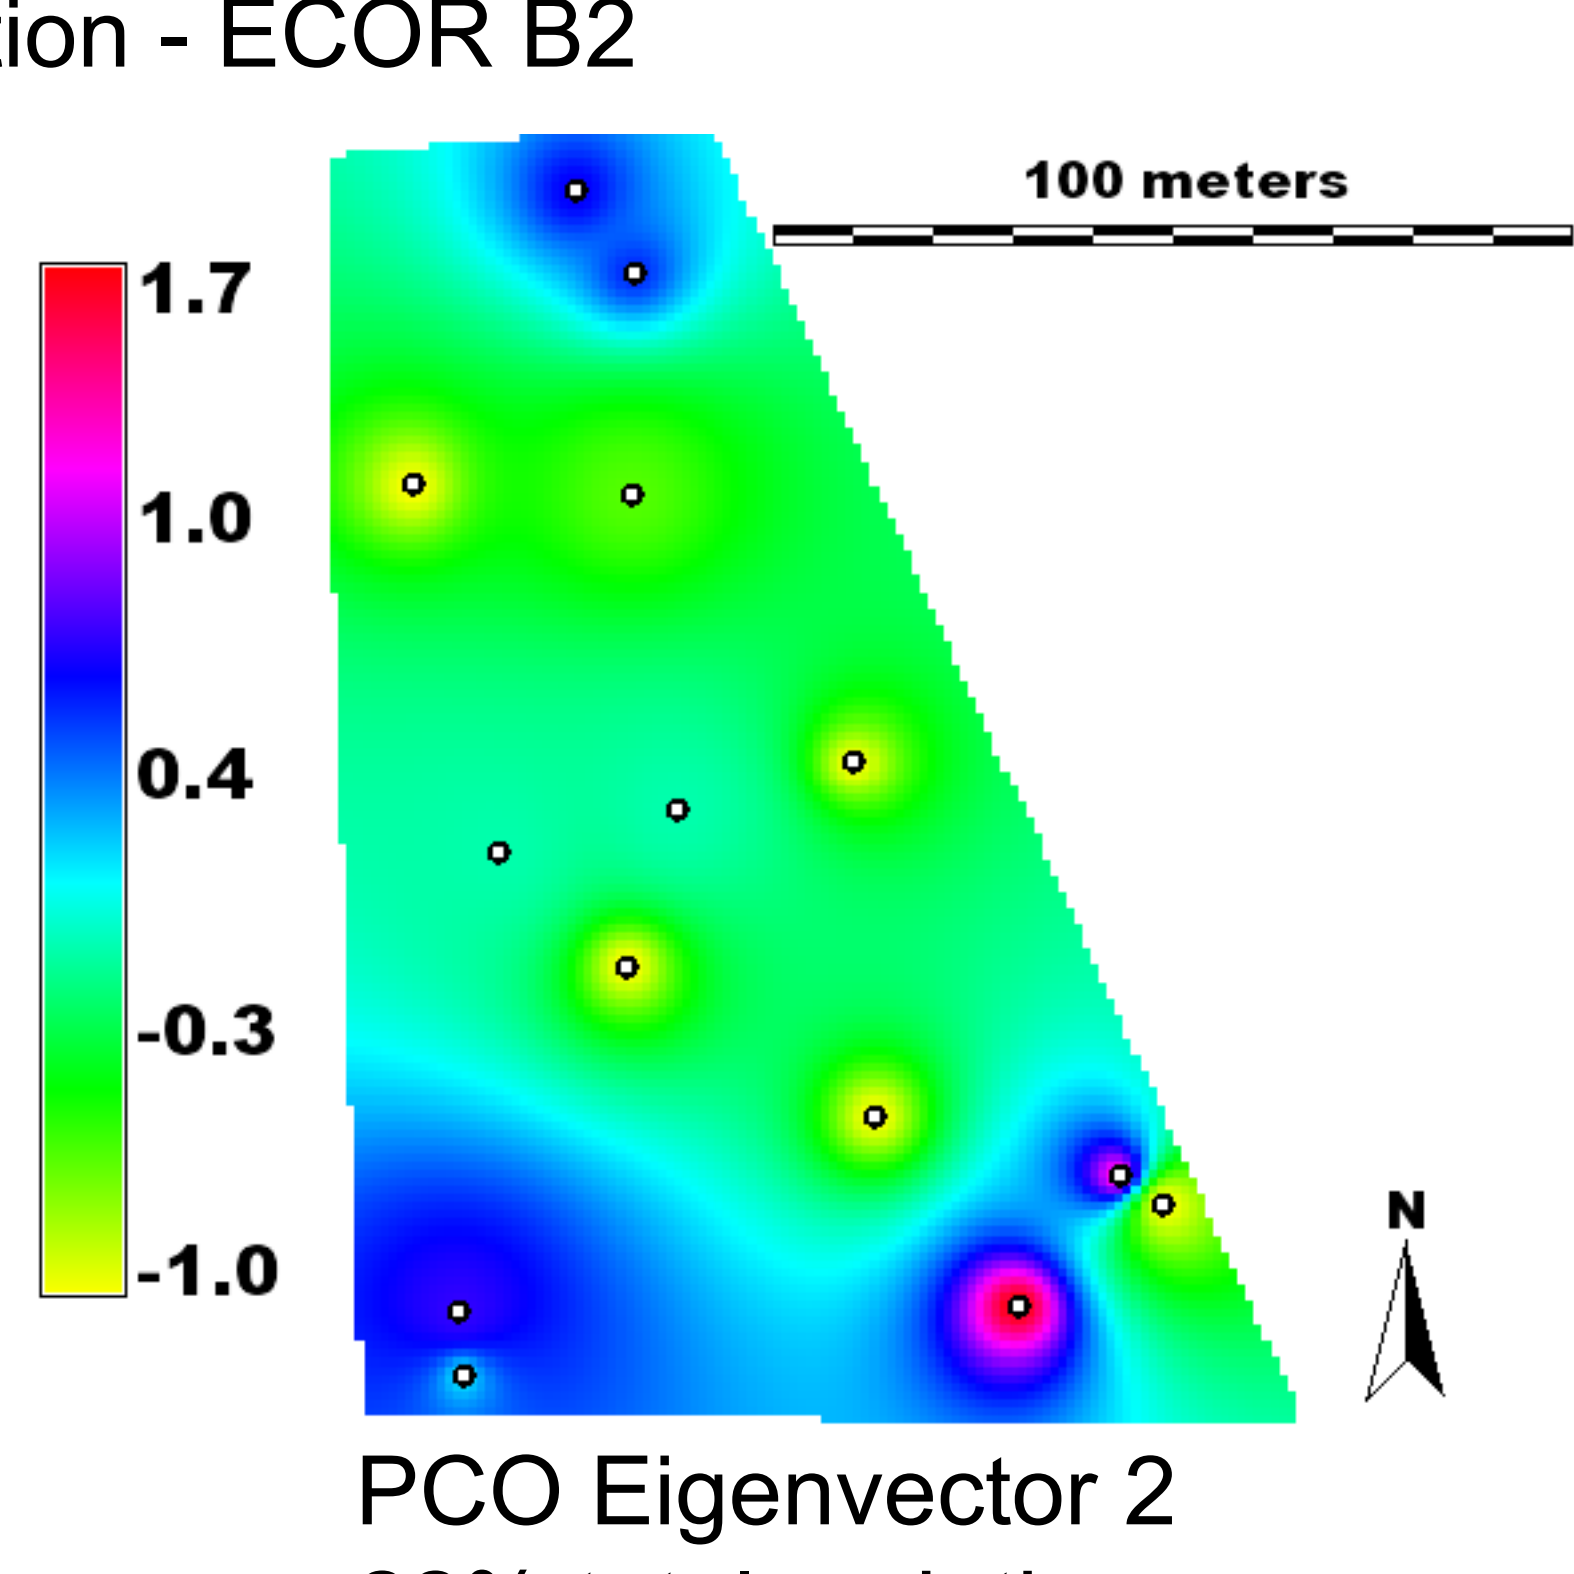

Genetic Variation - ECOR D

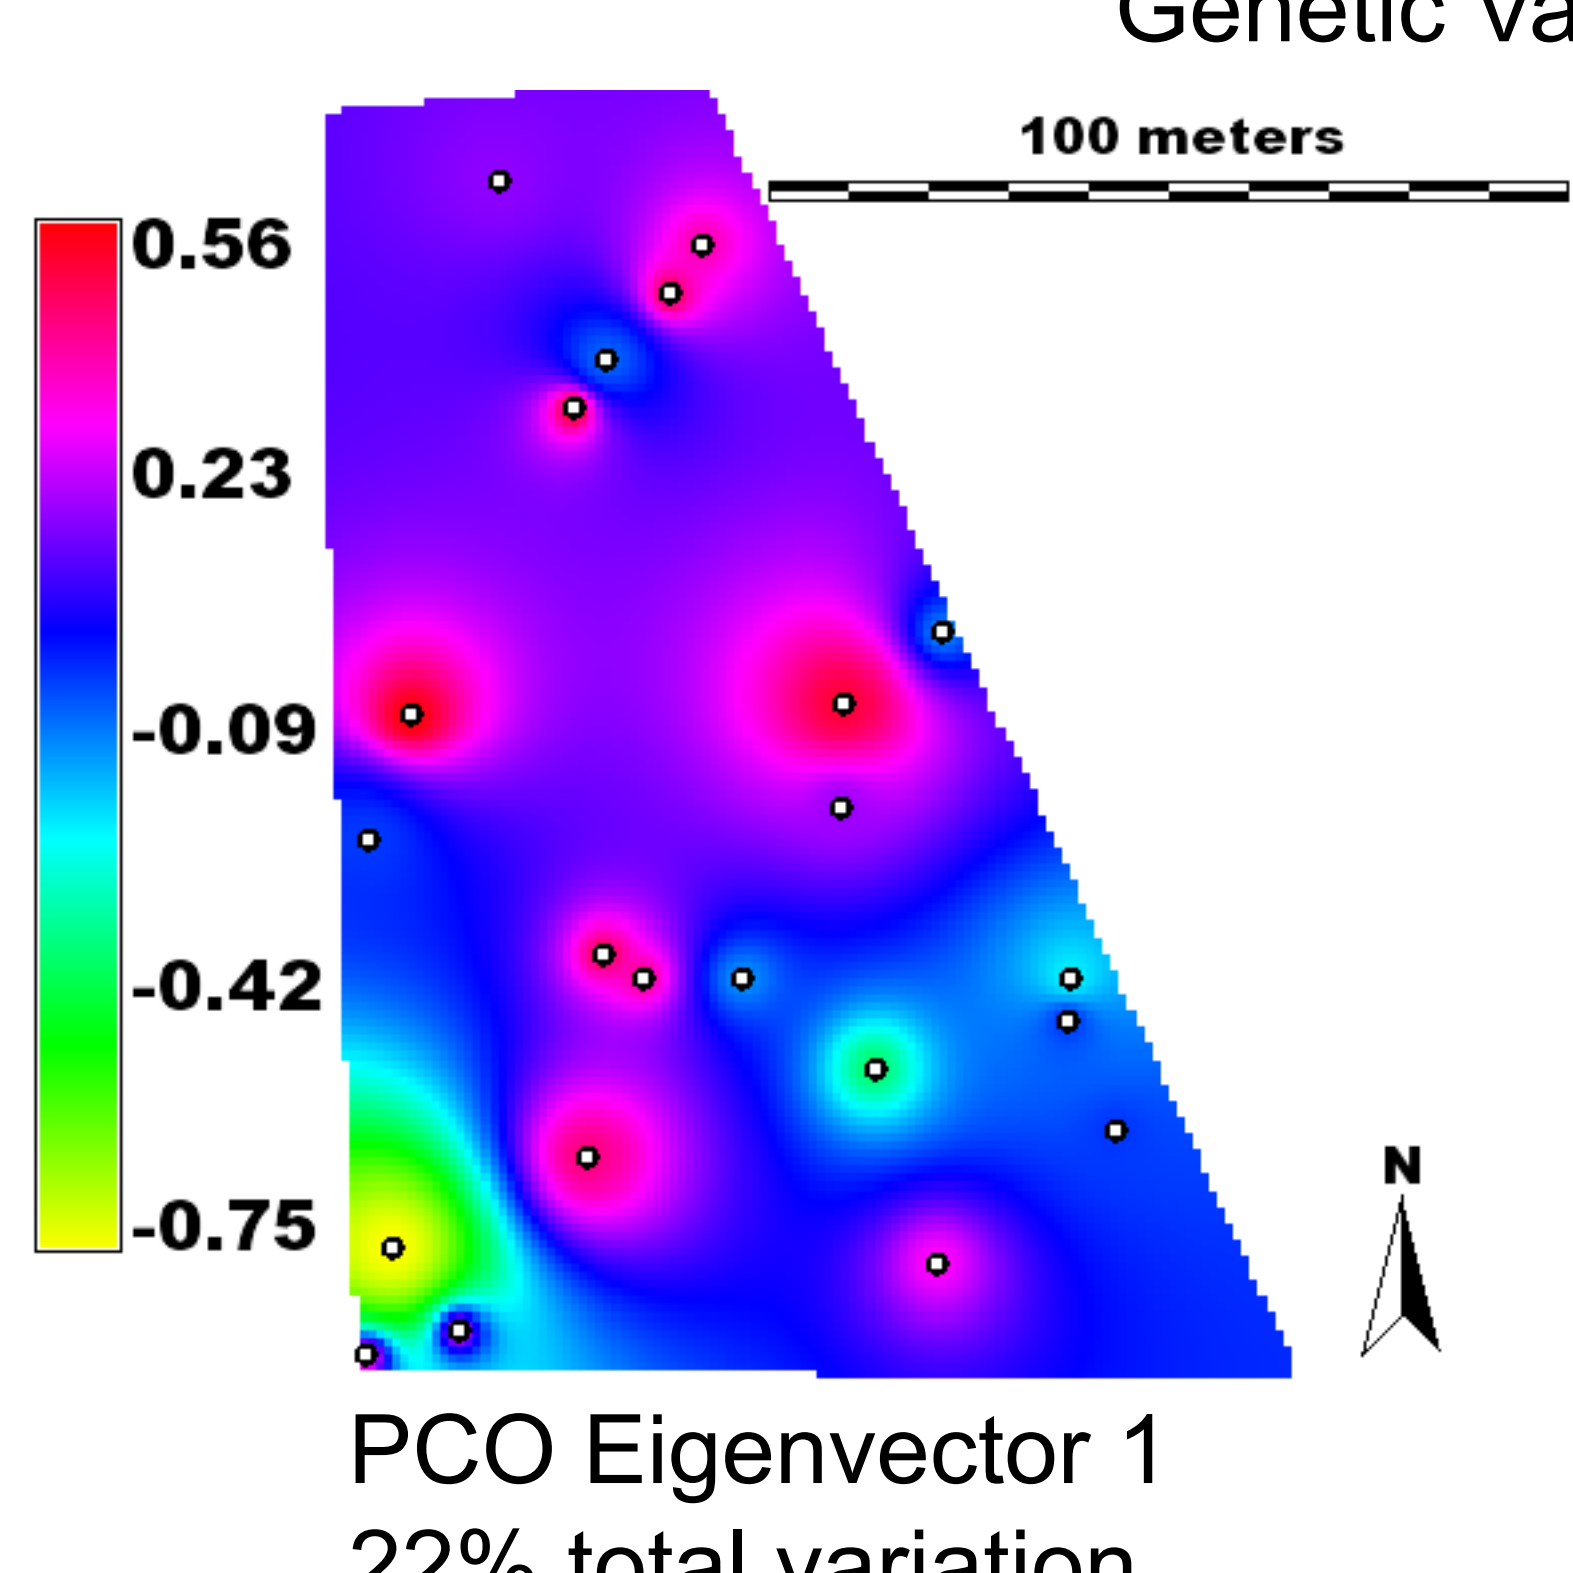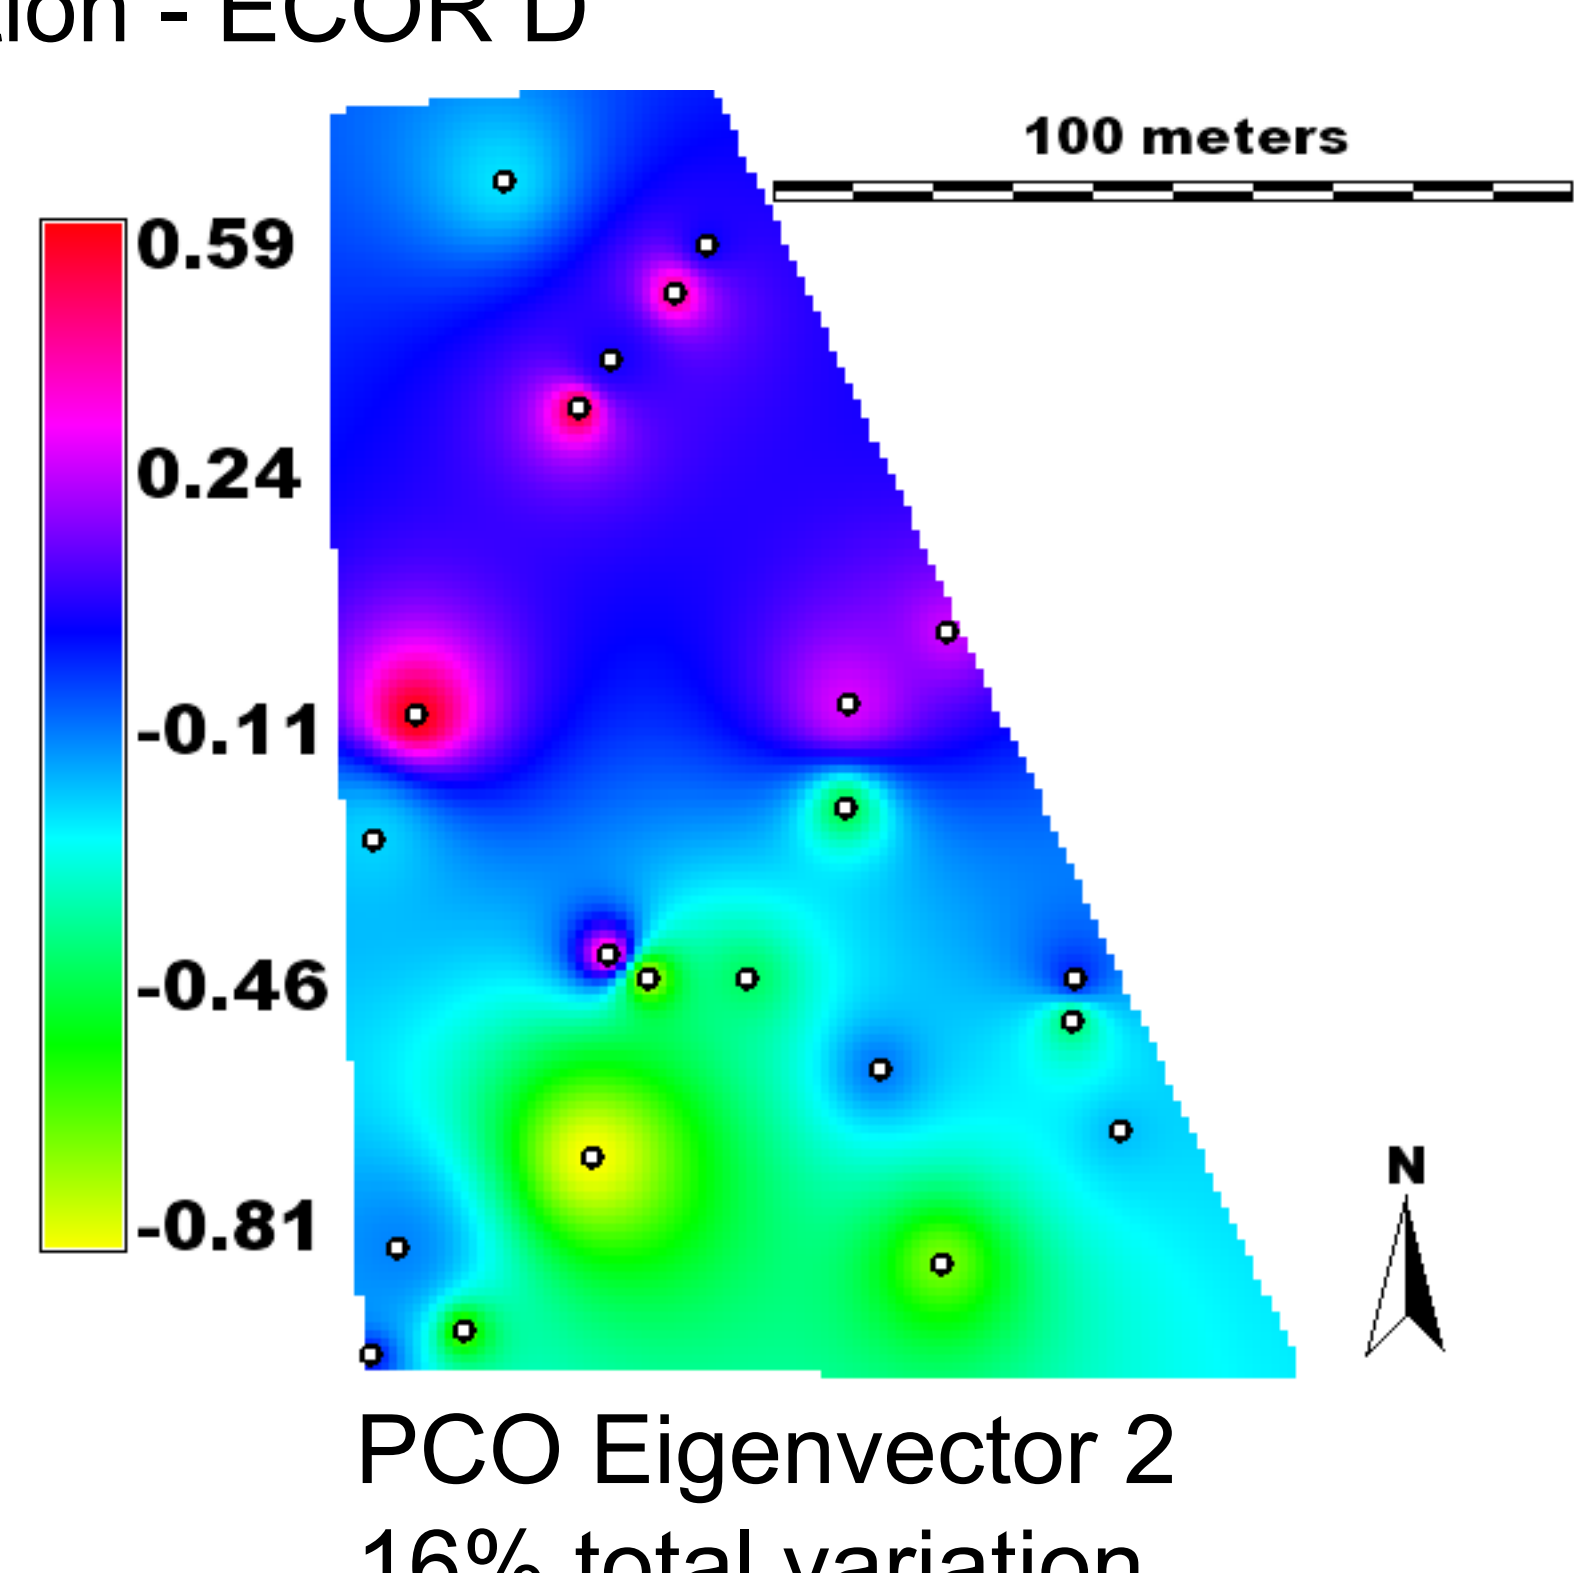

Genetic variation - ECOR E

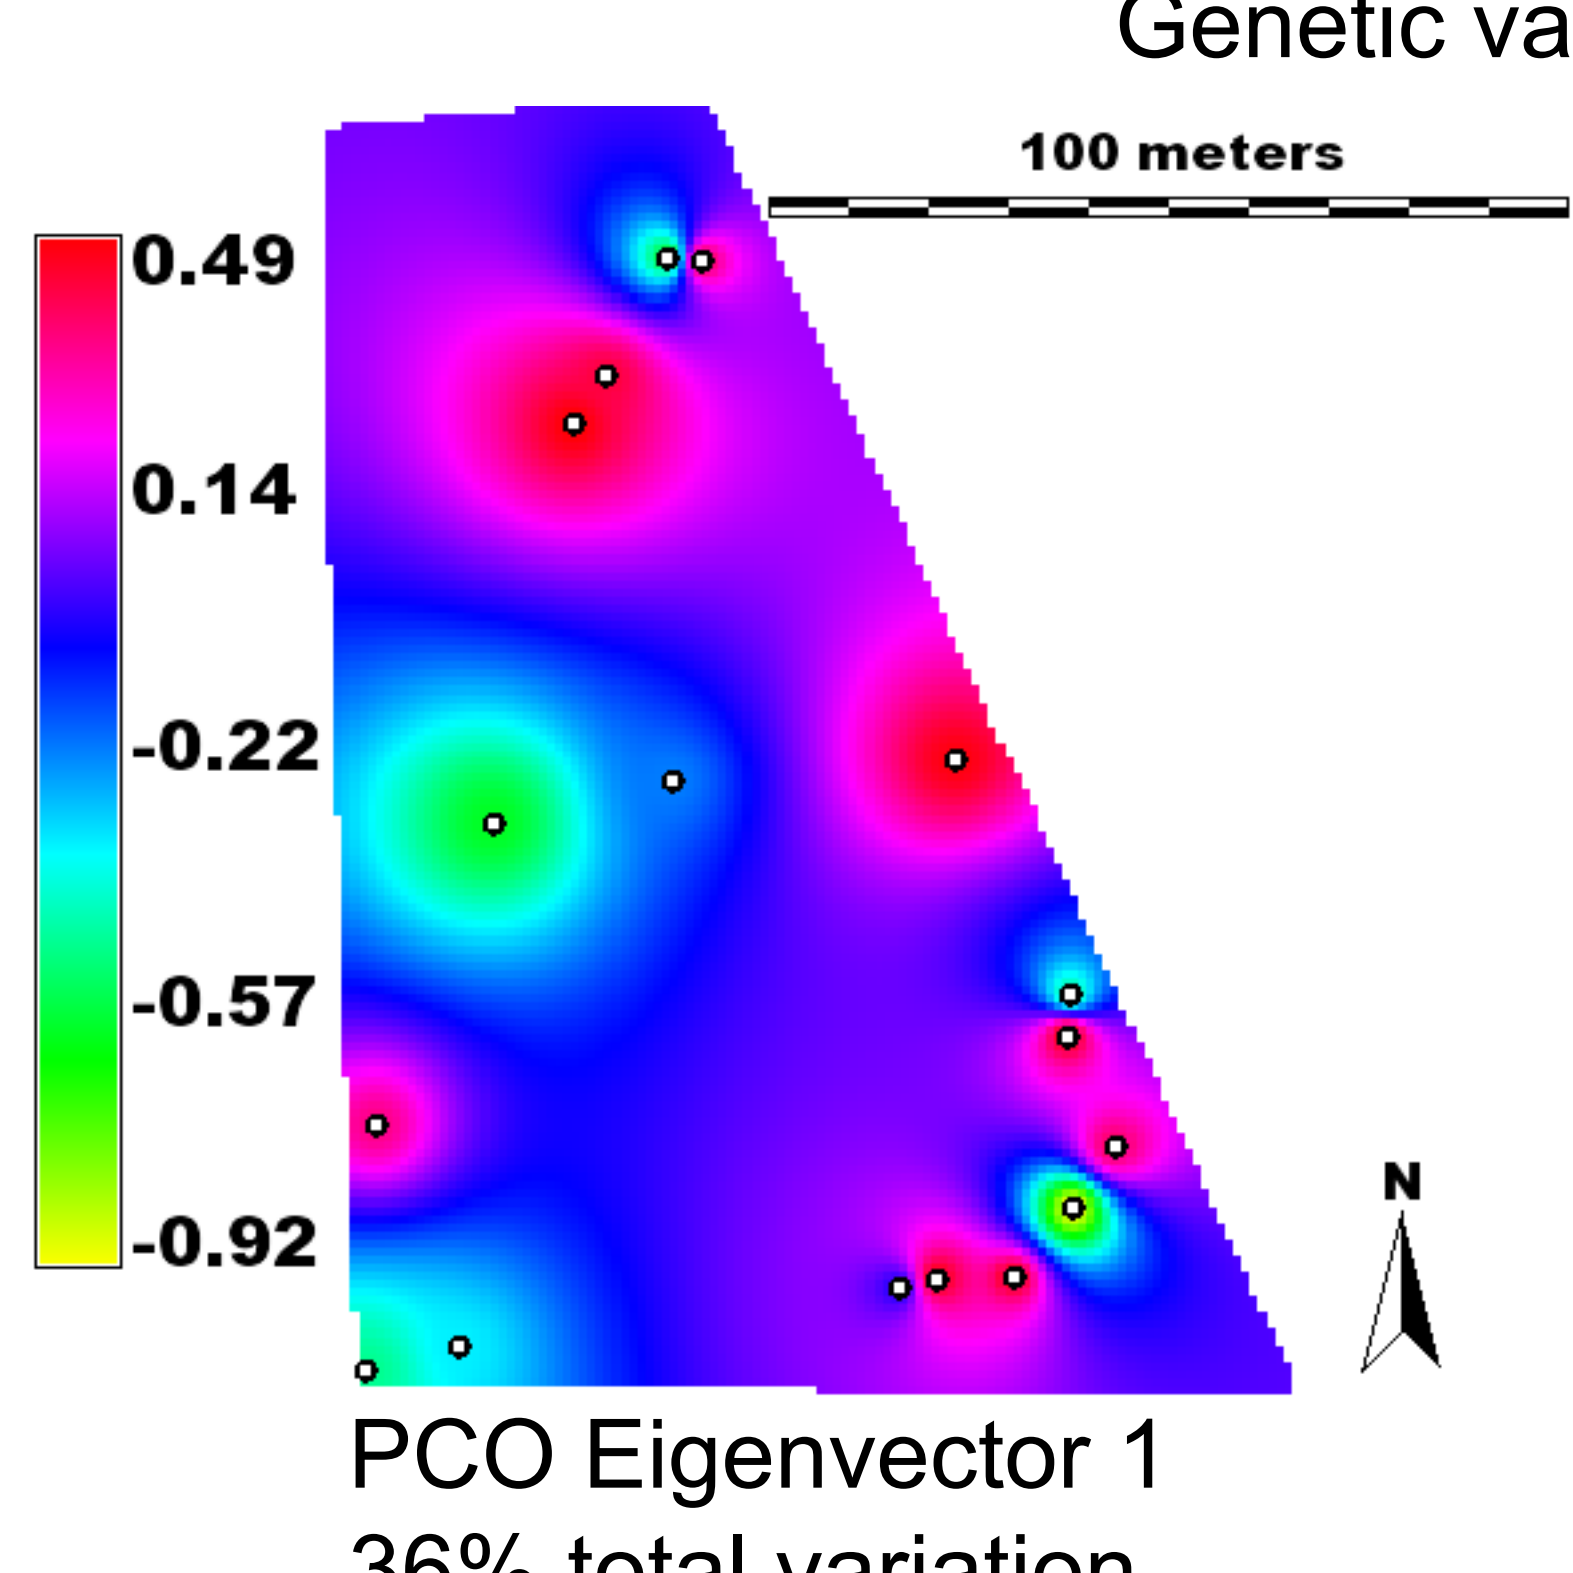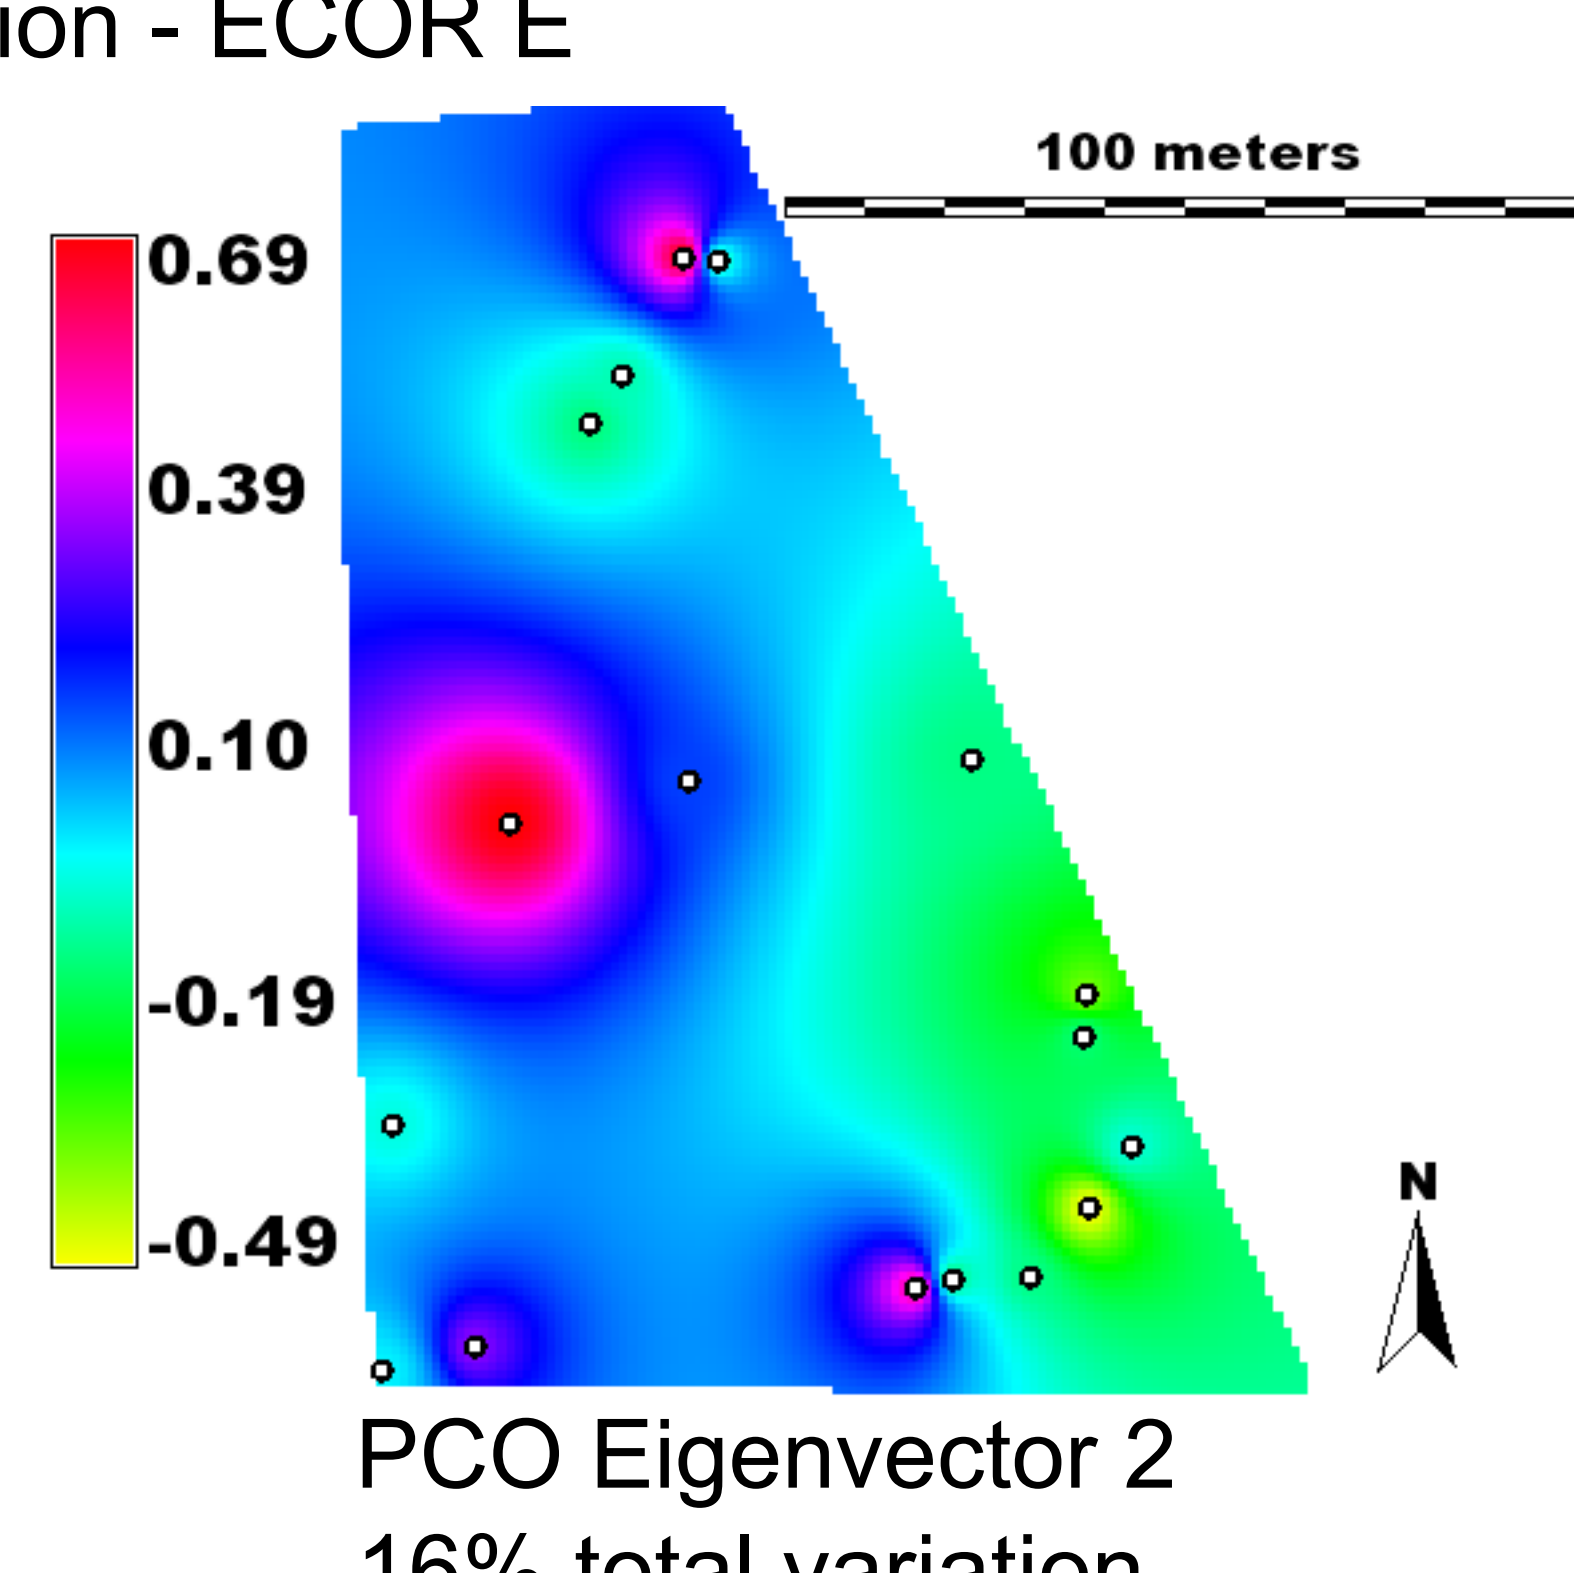

Genetic Variation - Clade ET-1

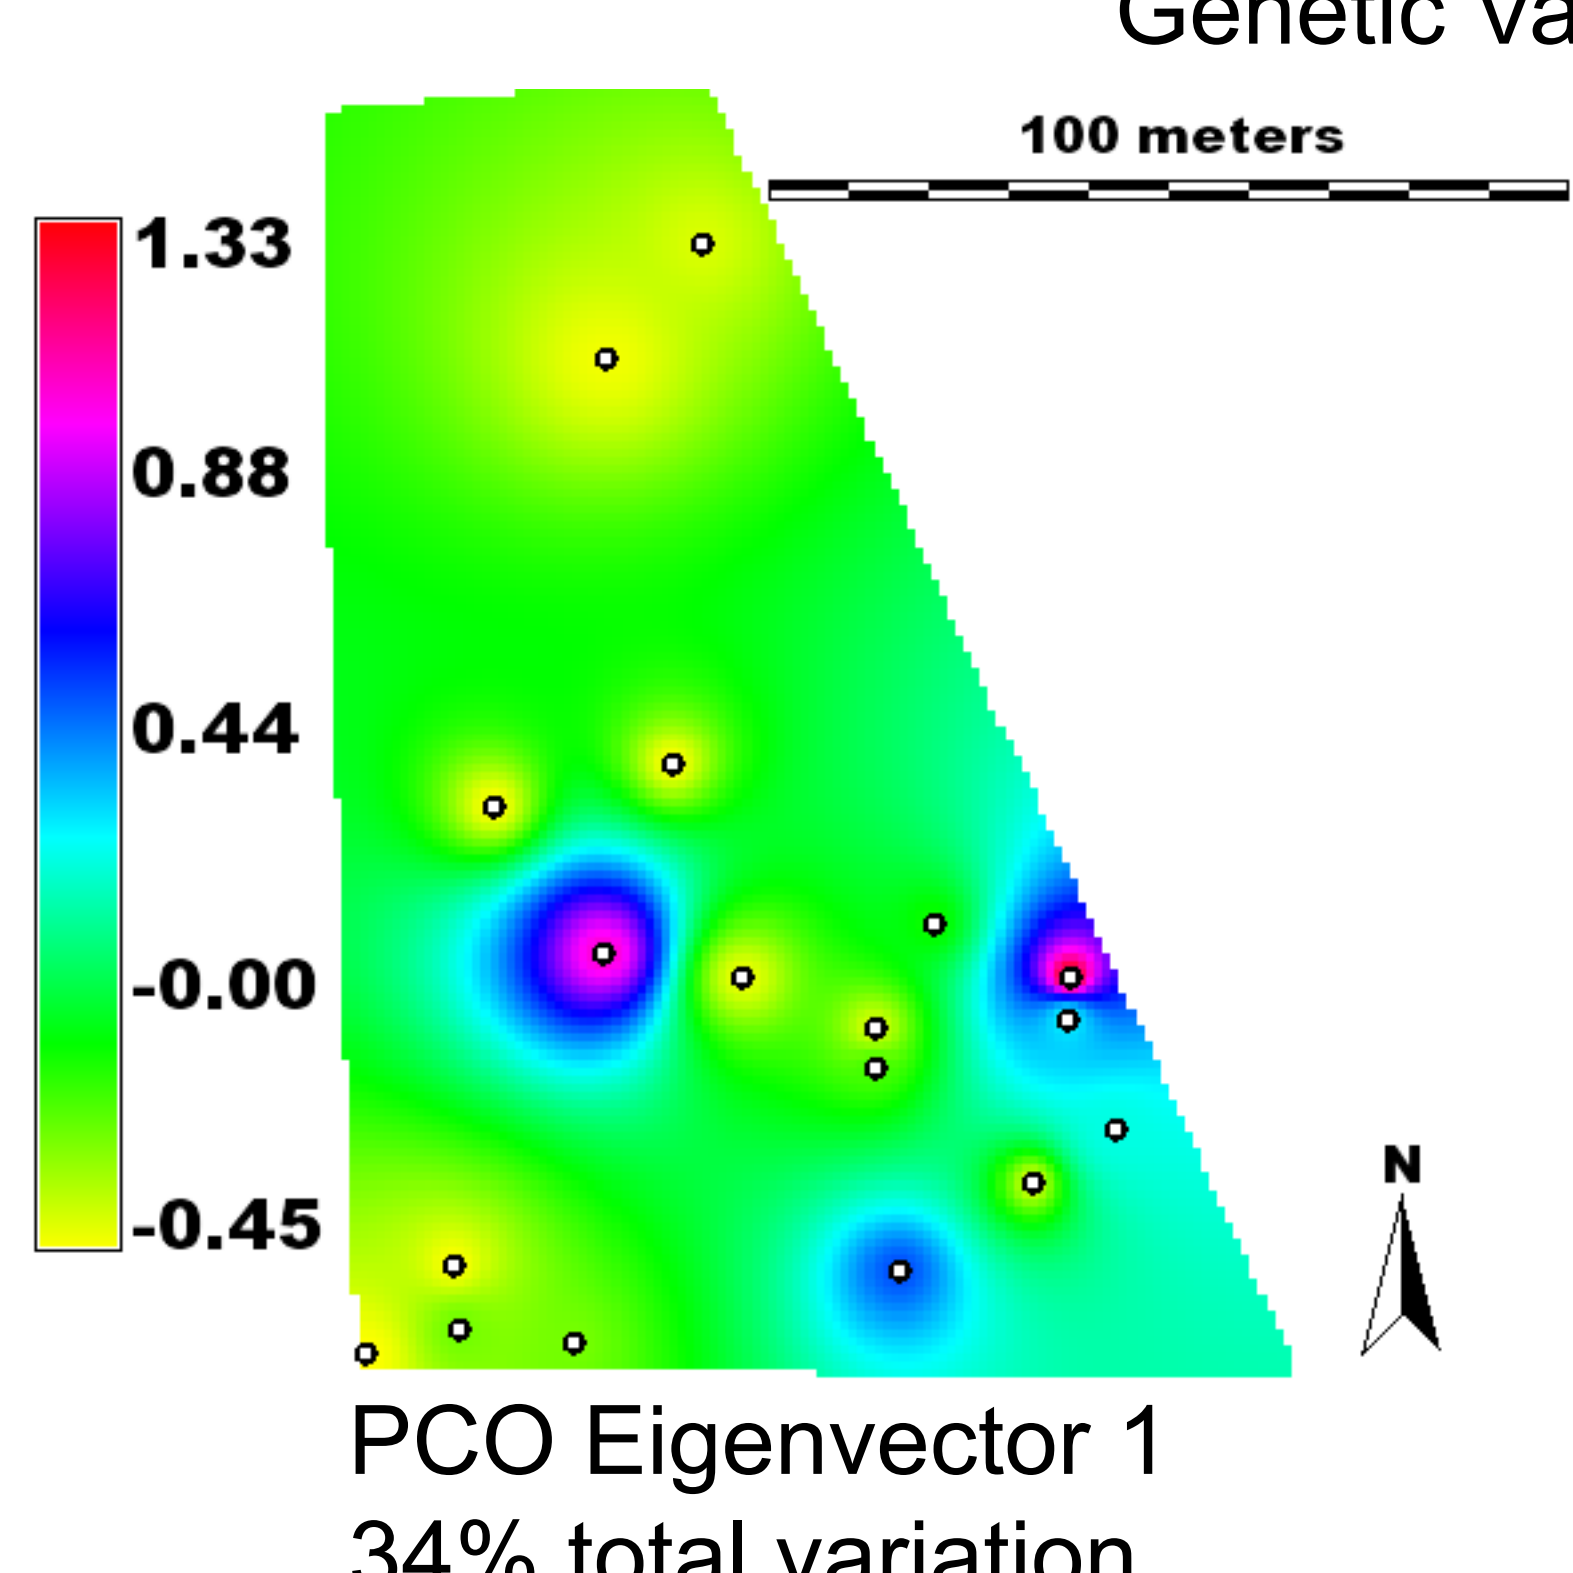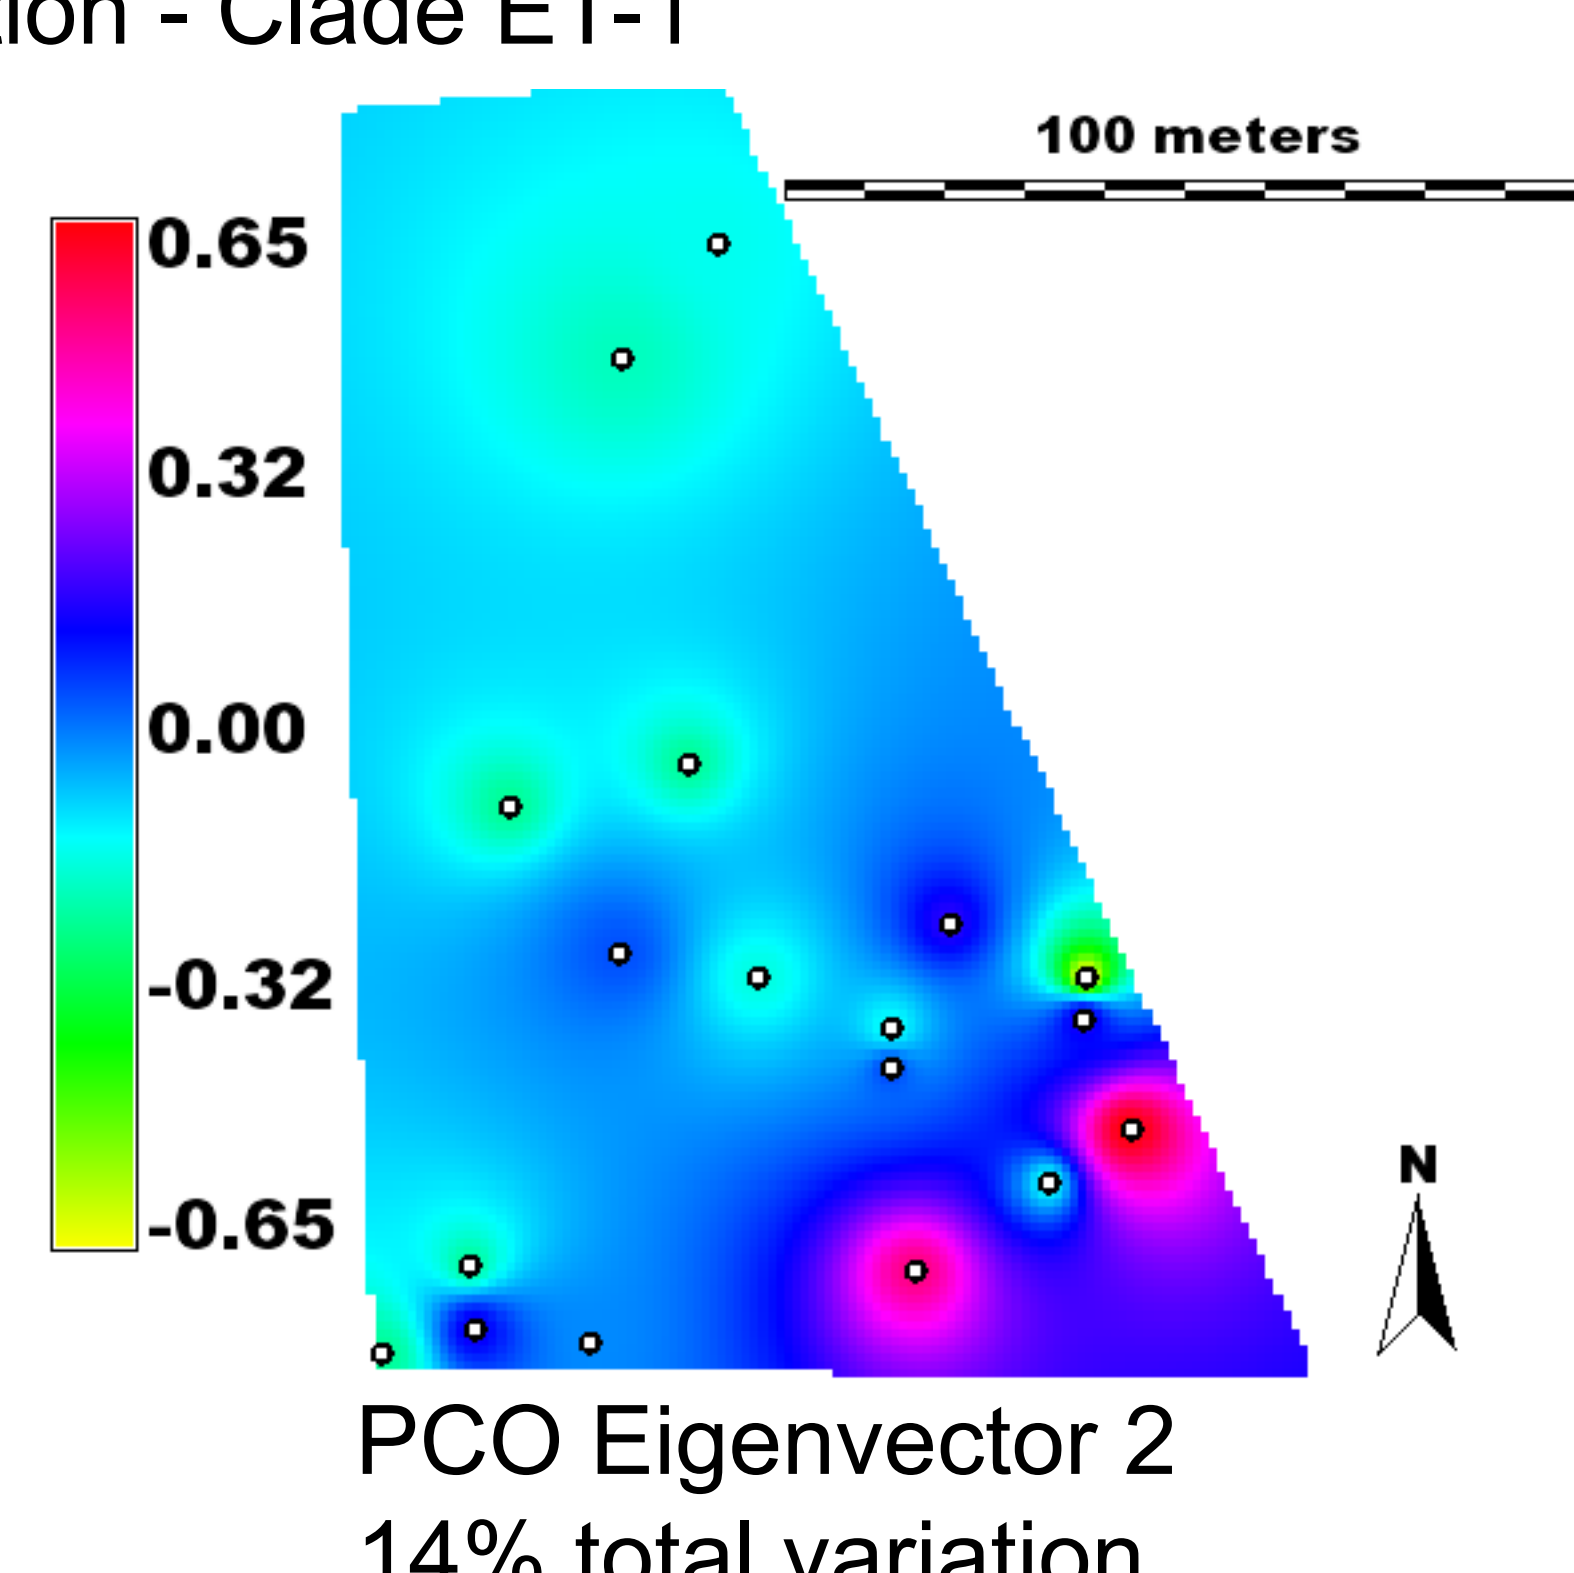

Supplement: supp_77_1_211__3.pdf [file supp_77_1_211__3.pdf]
