# Supplementary material
Source: PubMed Central journal article supplement (PMC3019742)

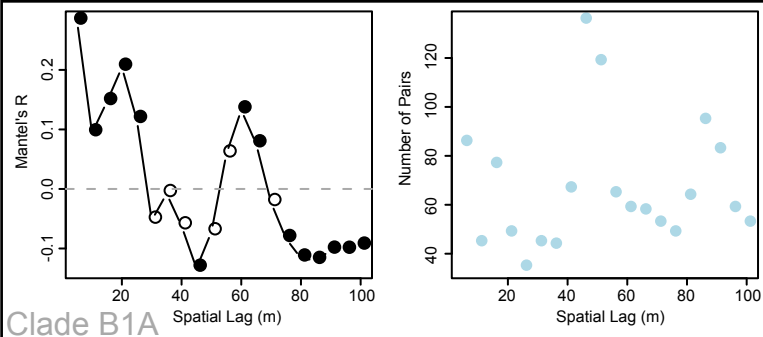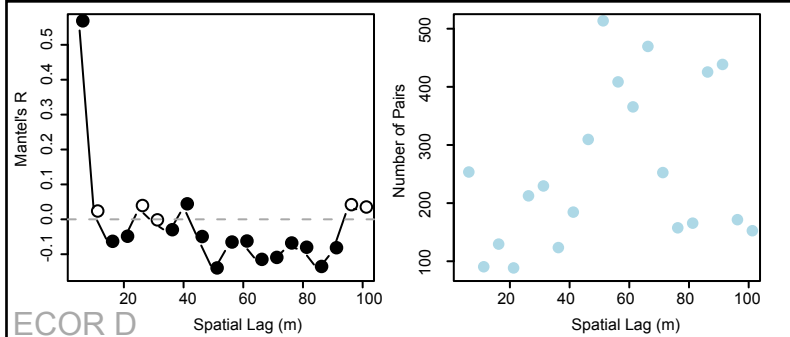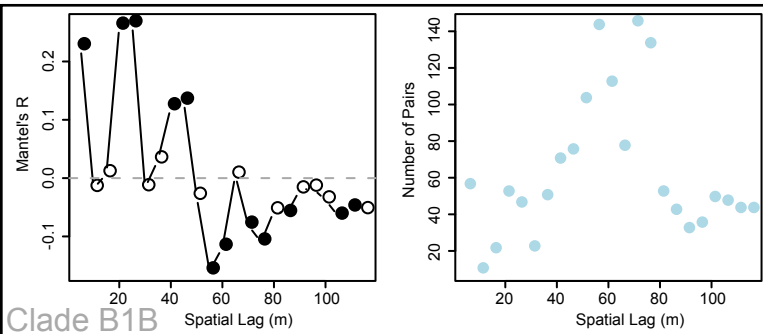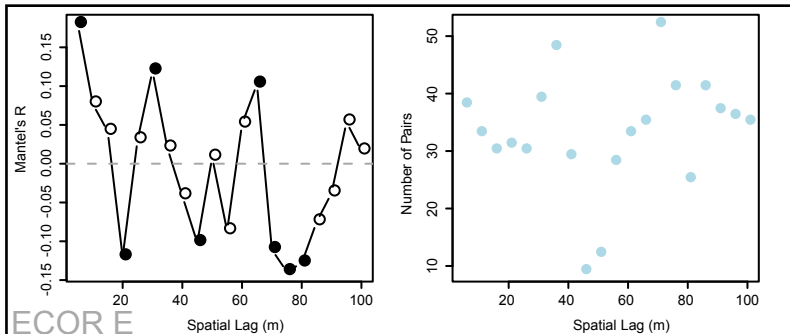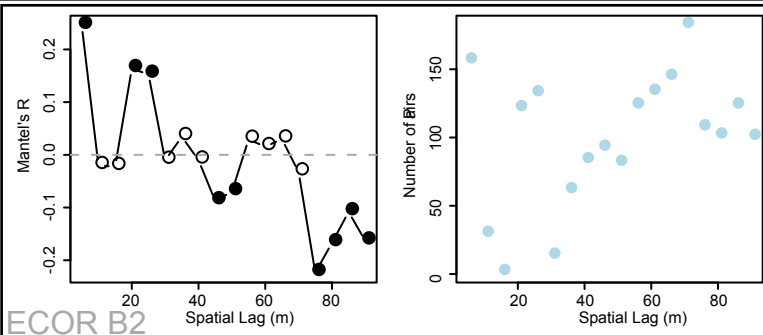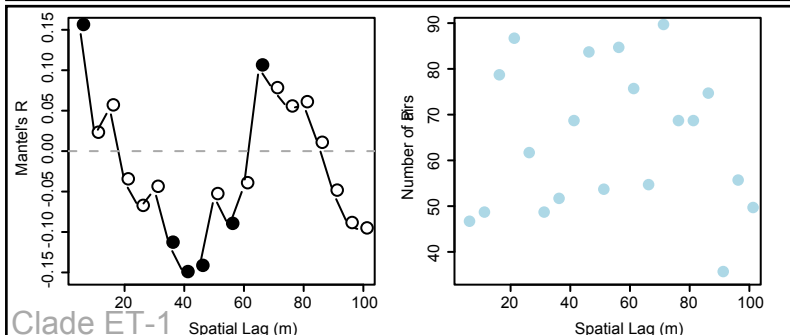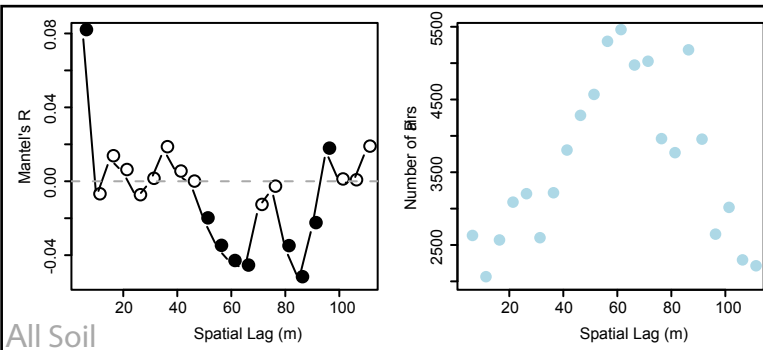

Supplement: supp_77_1_211__1.pdf [file supp_77_1_211__1.pdf]

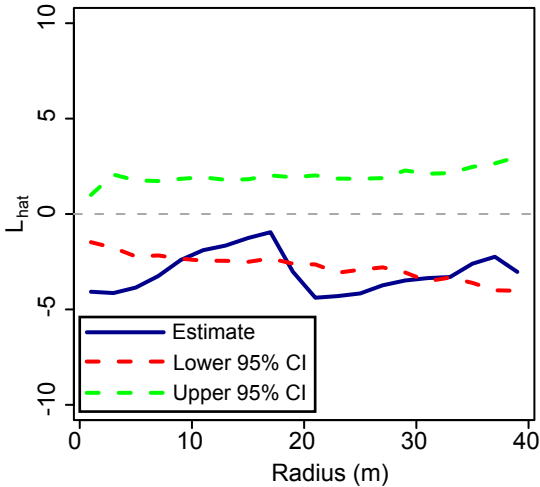

Supplement: supp_77_1_211__2.pdf [file supp_77_1_211__2.pdf]
